## **A bivalent EBV vaccine induces neutralizing antibodies that block B and epithelial cell infection and confer immunity in humanized mice**

Chih-Jen Wei<sup>1,2\*</sup>, Wei Bu<sup>3\*</sup>, Laura A. Nguyen<sup>1\*§</sup>, Joseph D. Batchelor<sup>4</sup>, JungHyun Kim<sup>3</sup>, Stefania Pittaluga<sup>5</sup>, James R. Fuller<sup>4§</sup>, Hanh Nguyen<sup>3</sup>, Te-Hui Chou<sup>1,2</sup>, Jeffrey I. Cohen<sup>3†</sup>, Gary J. Nabel<sup>1,2†</sup>

<sup>1</sup>Sanofi,  
640 Memorial Dr., Cambridge, MA.01239

<sup>2</sup>ModeX Therapeutics Inc.  
22 Strathmore Rd., Natick, MA 07160

<sup>3</sup>Laboratory of Infectious Diseases, National Institute of Allergy and Infectious Diseases,  
National Institute of Health.  
50 South Dr., Bethesda, MD. 20892

<sup>4</sup>Integrated Drug Discovery, Sanofi,  
Waltham, MA.02451

<sup>5</sup>Laboratory of Pathology, Center for Cancer Research, National Cancer Institute, National  
Institutes of Health, Bethesda, MD 20892

\* These authors contributed equally to this work.

† To whom correspondence should be addressed: Gary J. Nabel ([gary.nabel@modextx.com](mailto:gary.nabel@modextx.com));  
[Jeffrey I. Cohen \(jcohen@niaid.nih.gov\)](mailto:jcohen@niaid.nih.gov)

§ Current address: Omega Therapeutics, Cambridge, MA (L. Nguyen); Department of  
Biochemistry and Molecular Biology, University of Chicago, Chicago, IL (J. R. Fuller)

**One sentence summary:** A bivalent gp350 and gH/gL/gp42 nanoparticle vaccine elicits neutralizing antibodies that protect against EBV infection and EBV lymphoma *in vivo*.

## ABSTRACT

1  
2       **Epstein Barr virus (EBV) is the major cause of infectious mononucleosis and is**  
3 **associated with several human cancers. Despite its prevalence and major impact on human**  
4 **health, there are currently no specific vaccines or treatments. Four viral glycoproteins, gp**  
5 **350 and gH/gL/gp42 mediate entry into the major sites of viral replication, B cells and**  
6 **epithelial cells. Here, we designed a nanoparticle vaccine displaying these proteins and show**  
7 **that it elicits potent neutralizing antibodies that protect against infection *in vivo*. Based on**  
8 **structural analyses, we designed single chain gH/gL and gH/gL/gp42 proteins that were each**  
9 **fused to bacterial ferritin to form a self-assembling nanoparticles. X-ray crystallographic**  
10 **analysis revealed that single chain gH/gL and gH/gL/gp42 adopted a similar conformation**  
11 **to the wild type proteins, and the protein spikes were observed by electron microscopy.**  
12 **Single chain gH/gL or gH/gL/gp42 nanoparticle vaccines were constructed to ensure product**  
13 **homogeneity needed for clinical development. These vaccines elicited neutralizing**  
14 **antibodies in mice, ferrets, and non-human primates that inhibited EBV entry into both B**  
15 **cells and epithelial cells. When mixed with a previously reported gp350 nanoparticle vaccine,**  
16 **gp350D<sub>123</sub>, no immune competition was observed. To confirm its efficacy in vivo, humanized**  
17 **mice were challenged with EBV after passive transfer of IgG from mice vaccinated with**  
18 **control, gH/gL/gp42+gp350D<sub>123</sub> or gH/gL+gp350D<sub>123</sub> nanoparticles. While all control**  
19 **animals (6/6) were infected, only one mouse in each vaccine group that received immune IgG**  
20 **had transient low level viremia (1/6). Furthermore, no EBV lymphomas were detected in**  
21 **immune animals in contrast to non-immune controls. This bivalent EBV nanoparticle**  
22 **vaccine represents a promising candidate to prevent EBV infection and EBV-related**  
23 **malignancies in humans.**

24

## INTRODUCTION

25 Over 95% of adults worldwide are infected with Epstein-Barr virus (EBV), the primary  
26 agent for infectious mononucleosis (IM) (1). EBV was discovered in the 1960s and was the first  
27 human virus associated with cancer; EBV has since been associated with malignancies such as  
28 nasopharyngeal carcinoma, Hodgkin's lymphoma, non-Hodgkin's lymphoma, Burkitt's  
29 lymphoma, NK/T cell lymphomas, peripheral T-cell lymphomas and gastric cancer (1, 2). Each  
30 year, more than 200,000 cases of cancer are associated with EBV infection, resulting in ~140,000  
31 deaths (2). EBV is also the main cause of lymphoproliferative disease in patients with  
32 immunodeficiencies. Nearly all post-transplant lymphoproliferative disorder (PTLD) in the first  
33 year after is caused by EBV (3).

34 There is currently no therapy to effectively treat EBV infection, and there is no vaccine to  
35 prevent EBV infection. Prior vaccine development attempts mainly focused on one of the viral  
36 envelope glycoproteins gp350 as it is the most abundant surface protein and is the major target of  
37 neutralizing antibodies (4). gp350 mediates viral entry to B cells by engaging complement receptor  
38 2 (CR2/CD21) (5). Other viral surface glycoproteins, namely gH, gL, gB, gp42 and BMRF2 also  
39 play a role in EBV infection and are also targets of neutralizing antibodies. gp42 binds to human  
40 leukocyte antigen (HLA) class II and together with gH/gL heterodimer and gB forms a complex  
41 that promotes EBV entry to B cells (6). Infection of EBV to epithelial cells is initiated by the  
42 engagement of BMRF2 and gH/gL complex with integrin receptors and ephrin receptor A2 (7-9).  
43 A prototype gp350 vaccine reduced the incidence of IM by 78%, but did not prevent infection in  
44 a phase II clinical trial (10). Other gp350-based vaccines have also shown protective efficacy in  
45 relevant nonhuman primate models (7, 11, 12). Recombinant gH/gL complex or gB have also been  
46 shown to induce neutralizing antibody responses in rabbits (13). We have previously shown that

47 a nanoparticle (NP)-based gp350 vaccine elicited protective immunity (14), and gH/gL and  
48 gH/gL/gp42 NP vaccines induced potent neutralizing antibodies that inhibit EBV entry in both B  
49 cells and epithelial cells (15). In this study, we optimized the consistency of gH/gL and  
50 gH/gL/gp42 that could reduce the heterogeneity of these heteromeric proteins by generating a  
51 single chain polypeptide based on structural biology. This approach not only preserved the  
52 presentation of these antigens but also ensured that the gH/gL and gp42 heteromers were uniformly  
53 assembled to improve product consistency required for clinical grade vaccines. Here, we have  
54 evaluated the structure, immunogenicity and protection of single chain gH/gL-NP or single chain  
55 gH/gL/gp42-NP together with gp350-NP in relevant animal models.

56

57

## RESULTS

58

### **Design and characterization of single chain gH/gL and gH/gL/gp42 nanoparticles**

59

60

61

62

63

64

65

66

67

68

69

When co-transfection of plasmids is used to generate multimeric complexes (15), there is potential inconsistency in the product if the appropriate stoichiometry is not achieved. To address this concern, we generated single chain gH/gL or gH/gL/gp42 complexes using structural data to fuse the ectodomains with flexible linkers (Fig. 1A). Fusion to specific sites on ferritin (14) facilitated the formation of self-assembling nanoparticles (NP). The gH/gL and gH/gL/gp42 fusion proteins migrated as a single band on SDS-PAGE gel (Fig. S1). Crystal structures of single chain gH/gL and single chain gH/gL/gp42 were determined (Fig. 1B; Supplemental Table 1). Each structure superimposed on previously published heterodimeric gH/gL (PDB 3PHF) and heterotrimeric gH/gL/gp42 (PDB 5T1D) complex structures, respectively, demonstrating that single chain gH/gL and single chain gH/gL/gp42 adopt native conformations resembling the wild-type complexes (Fig. 1B). Both gH/gL-NP and gH/gL/gp42-NP could be purified by ion exchange

70 and size-exclusion chromatography (Fig. 1C, left), and dynamic light scattering analysis  
71 documented the expected particle radius of 20.7 nm and 24.8 nm for single chain gH/gL-NP and  
72 single chain gH/gL/gp42-NP, respectively (Fig 1C, right). The single chain gH/gL-NP and single  
73 chain gH/gL/gp42-NP were also visualized by transmission electron microscopy, showing visible  
74 spikes protruding from the ferritin core, consistent with the expected structure and stoichiometry  
75 (Fig. 1D, left and right panels respectively).

### 76 **Immunogenicity of single chain gH/gL-NP or gH/gL/gp42-NP in mice**

77 The immunogenicity of single chain gH/gL-NP was first evaluated in mice with or without  
78 AF03, a squalene-based oil-in-water emulsion adjuvant previously used in a pandemic influenza  
79 vaccine (16). The anti-gH/gL antibody titer was significantly higher in the adjuvanted group after  
80 each immunization (Supplemental Fig. 2,  $p < 0.0001$ ). All subsequent animal studies were therefore  
81 carried out in the presence of AF03 adjuvant. Single chain gH/gL-NP elicited a robust antibody  
82 response against the gH/gL complex and when used together with the previously described  
83 gp350D<sub>123</sub>-NP (14), no immune competition was seen (Supplemental Fig. 3). Similar results were  
84 observed when gp42 was included to generate a single chain gH/gL/gp42-NP that induced  
85 antibodies against both gH/gL and gp42 after immunization (Supplemental Fig. 4A). Again, no  
86 immune competition was observed when mice were given a bivalent single chain-gH/gL/gp42-NP  
87 and gp350D<sub>123</sub>-NP vaccine as the antibodies titers against each individual antigen remained at the  
88 similar levels (Supplemental Fig. 4B). The neutralizing activity of sera from animals immunized  
89 with single chain gH/gL-NP and single chain gH/gL/gp42-NP were evaluated in both B cells and  
90 epithelial cells (Fig 2). Single chain gH/gL-NP, gH/gL/gp42-NP and gp350D<sub>123</sub>-NP all elicited  
91 potent neutralizing antibodies that blocked virus entry to B cells, and the neutralizing IC<sub>50</sub> titers  
92 remained at similar or higher levels when single chain gH/gL-NP or single chain gH/gL/gp42-NP

93 was mixed with gp350D<sub>123</sub>-NP in a bivalent vaccine (Fig. 2A, 2B, left,  $p < 0.05$  compared to  
94 control). Virus neutralization in epithelial cells was also evident in mice that received single chain  
95 gH/gL-NP and single chain gH/gL/gp42-NP while gp350D<sub>123</sub>-NP antiserum had minimum effect  
96 in blocking EBV infection in epithelial cells, consistent with our previous report (15) (Fig. 2A,  
97 right,  $p < 0.05$  compared to control). Again, bivalent single chain gH/gL-NP+gp350D<sub>123</sub>-NP or  
98 single chain gH/gL/gp42-NP+gp350D<sub>123</sub>-NP induced similar neutralizing antibody titers as the  
99 monovalent single chain gH/gL-NP and single chain gH/gL/gp42-NP, respectively (Fig. 2A, 2B,  
100 right,  $p < 0.05$  compared to control).

101 **Bivalent single chain gH/gL-NP+gp350D<sub>123</sub>-NP or single chain gH/gL/gp42-NP+gp350D<sub>123</sub>-**  
102 **NP elicited neutralizing antibodies in ferrets and non-human primates**

103 We next evaluated the immunogenicity of bivalent single chain gH/gL-NP+gp350D<sub>123</sub>-NP  
104 and single chain gH/gL/gp42-NP+gp350D<sub>123</sub>-NP in EBV-naïve ferrets. Non-immune ferrets were  
105 immunized with 2 doses of single chain gH/gL-NP+gp350D<sub>123</sub>-NP or single chain gH/gL/gp42-  
106 NP+gp350D<sub>123</sub>-NP at weeks 0 and 4. Immune sera from ferrets receiving single chain  
107 gH/gL/gp42-NP+gp350D<sub>123</sub>-NP elicited more potent neutralizing antibodies that inhibit virus  
108 entry to B cells than animals immunized with single chain gH/gL-NP+gp350D<sub>123</sub>-NP (Fig 3A, left,  
109  $p < 0.05$  compared to pre-immune sera). In epithelial cells, both single chain gH/gL-  
110 NP+gp350D<sub>123</sub>-NP and single chain gH/gL/gp42-NP+gp350D<sub>123</sub>-NP anti-sera showed high titers  
111 of antibodies that neutralized EBV infection (Fig 3A, right,  $p < 0.05$  compared to pre-immune sera).  
112 These findings were confirmed by measuring ELISA binding of antibodies to each component  
113 elicited by each bivalent vaccine (Supplemental Fig. 5, \*\* $p < 0.0001$  or \* $p < 0.05$  respectively  
114 compared to pre-immune sera). Background reactivity observed in pre-immune ferret sera likely  
115 represented non-specific binding of the secondary anti-ferret antibody as it was not observed in

116 the neutralization assay. Despite this background, antibody levels increased 9-400-fold after  
117 immunization.

118 A high percentage of rhesus macaques are infected naturally during infancy with rhesus  
119 lymphocryptovirus (rhLCV), a herpesvirus closely related and immunologically cross-reactive  
120 with EBV (17). To determine whether vaccination could boost pre-existing immune responses,  
121 we immunized rhesus macaques (*Macaca mulatta*) with single chain gH/gL-NP+gp350D<sub>123</sub>-NP  
122 or single chain gH/gL/gp42-NP+gp350D<sub>123</sub>-NP to model immune responses in humans. After the  
123 third immunization, serum neutralization titers in animals receiving single chain gH/gL-  
124 NP+gp350D<sub>123</sub>-NP or single chain gH/gL/gp42-NP+gp350D<sub>123</sub>-NP were substantially elevated  
125 compared to the pre-immune sera (Fig 3B, left; 10,000-fold for single chain gH/gL-  
126 NP+gp350D<sub>123</sub>-NP and >2,000-fold for single chain gH/gL/gp42-NP+gp350D<sub>123</sub>-NP, \* p< 0.05  
127 compared to pre-immune sera). As expected, substantial reactivity was observed in pre-immune  
128 sera (Supplemental Fig. 6, top and bottom left), likely due to the high amino acid sequence identity  
129 between EBV and rhLCV gH (85.4%), gL (81.8%) and gp42 (88%) (17). Similar to the pre-  
130 existing anti-gH/gL and anti-gH/gL/gp42 binding antibodies, neutralizing activity was observed  
131 in epithelial cells with the pre-immune monkey sera. Nonetheless, the neutralizing antibody titers  
132 increased by more than 20- and ~7-fold after the third immunization with single chain gH/gL-  
133 NP+gp350D<sub>123</sub>-NP and single chain gH/gL/gp42-NP+gp350D<sub>123</sub>-NP, respectively (Fig. 3B, right)  
134 and the activity was maintained for at least 12 weeks (data not shown). These findings were  
135 confirmed by measuring ELISA binding titers to gH/gL and gH/gL/gp42. In contrast, little  
136 reactivity to gp350D<sub>123</sub> was observed in pre-immune sera because the homology between EBV  
137 and rhLCV gp350 is much lower (49%) (Supplemental Fig 6, top and bottom right). gp350 is  
138 important for EBV attachment to B cells before the gH/gL/gp42 complex initiates membrane

139 fusion and is likely the reason why there was minimal difference in neutralization between B and  
140 epithelial cells. Regardless of prior immunity, anti-gH/gL, anti-gH/gL/gp42 and anti-gp350  
141 antibody titers all increased after immunization (Supplemental Fig 6, \*\* $p < 0.0001$  or \* $p < 0.01$   
142 respectively compared to pre-immune sera). These data confirmed the immunogenicity of  
143 bivalent single chain gH/gL-NP+gp350D<sub>123</sub>-NP and single chain gH/gL/gp42-NP+gp350D<sub>123</sub>-NP  
144 vaccines and indicate that neutralizing antibodies were induced by these vaccines in nonhuman  
145 primates. Although there is variation in antibody titers elicited by the bivalent vaccine in different  
146 models, our data clearly demonstrate that neutralizing antibodies could be readily elicited by the  
147 bivalent vaccines described in both naïve and EBV-immune animal models.

148 **Bivalent single chain gH/gL-NP+gp350D<sub>123</sub>-NP or single chain gH/gL/gp42-NP+gp350D<sub>123</sub>-**  
149 **NP immune sera protected humanized mice from EBV infection and lymphoma**

150 To assess the protective efficacy of single chain gH/gL-NP+gp350D<sub>123</sub>-NP and single  
151 chain gH/gL/gp42-NP+gp350D<sub>123</sub>-NP vaccines, we performed an EBV challenge study using a  
152 humanized mouse model. Engraftment of human CD34<sup>+</sup> hematopoietic stem cells into NOD-scid  
153 IL2rg<sup>-/-</sup> mice (CD34<sup>+</sup> huNSG) allows for the reconstitution of human immune system components  
154 and these mice can be infected with EBV (*18-21*). Purified IgG from naïve (control), single chain  
155 gH/gL-NP+gp350D<sub>123</sub>-NP or single chain gH/gL/gp42-NP+gp350D<sub>123</sub>-NP immunized BALB/c  
156 mice were passively transferred to three groups of CD34<sup>+</sup> huNSG mice on days -1, 0 and +1 and  
157 mice were challenged intravenously with EBV on day 0. All animals in the control group had  
158 viremia while only one animal each receiving IgG from single chain gH/gL-NP+gp350D<sub>123</sub>-NP or  
159 single chain gH/gL/gp42-NP+gp350D<sub>123</sub>-NP immune animals had low level transient viremia on  
160 one day, further demonstrating the protective efficacy conferred by single chain gH/gL-  
161 NP+gp350D<sub>123</sub>-NP and single chain gH/gL/gp42-NP+gp350D<sub>123</sub>-NP vaccines (Fig. 4A,  $p < 0.05$  at



162 week 5 and week 9). In situ hybridization for EBV encoded RNA 1 (EBER1) showed viral RNA  
163 in tissue of 4 of 6 animals receiving control IgG, while tissues from all animals in the other two  
164 groups were entirely negative for EBER1 (Fig. 4B,  $p < 0.005$ ). Three of the six animals that  
165 received control IgG had EBV positive B cell lymphomas, while none of the animals that received  
166 IgG from either single chain gH/gL-NP+gp350D<sub>123</sub>-NP or single chain gH/gL/gp42-  
167 NP+gp350D<sub>123</sub>-NP immune animals developed lymphoma (Fig. 5 and Supplemental Fig. 7,  
168  $p < 0.05$ ). We also determined the levels of anti-gH/gL, anti-gH/gL/gp42 and anti-gp350 in animals  
169 1 week after challenge using an immunoprecipitation assay, and the antibody levels against gp350,  
170 gH/gL and gp42 were comparable to those from animals immunized with 2 doses of EBV vaccines  
171 in previous studies, ranging from  $10^5$  to  $10^6$  relative light units (Supplemental Fig. 8) (14, 15).

172

173

## DISCUSSION

174

175

176

177

178

179

180

181

182

183

184

An effective vaccine could reduce the burden of a variety of diseases associated with EBV infection, including infectious mononucleosis and a wide range of B cell and epithelial cell cancers. A previous phase 2 trial with an EBV gp350 vaccine reduced rate of infectious mononucleosis, but failed to induce sterilizing immunity in clinic (10), suggesting that additional immunogens that target viral entry to epithelial cells may be required for a successful prophylactic vaccine (15, 22). While EBV gp350 is important for attachment of the virus to B cells, it is not required for infection *in vitro*; in contrast, EBV gH, gL and gp42 are all essential for infection and EBV fusion to host cells. Here, we rationally designed vaccine candidates based on knowledge of their structural biology that allow expression of gH/gL and gH/gL/gp42 in a nanoparticle as a single polypeptide. This approach ensures the proper formation of 1:1 heterodimers for gH/gL and 1:1:1 heterotrimers for gH/gL/gp42, respectively. These single

185 chain recombinant proteins can be easily purified and the conformation of the gH/gL and  
186 gH/gL/gp42 nanoparticles remains intact compared with nanoparticles produced from  
187 combinations of polypeptides as determined by x-ray crystallography. The ability to express the  
188 gH/gL or gH/gL/gp42 nanoparticles as single polyproteins reduces the number of components  
189 required to generate the vaccines and enables greater control of product homogeneity that  
190 facilitates scaled manufacturing.

191 Immunization of mice with single chain gH/gL-NP or single chain gH/gL/gp42-NP  
192 induced high titers of antibodies that neutralized EBV entry to B cells and epithelial cells.  
193 Addition of a structurally optimized, truncated gp350, gp350D<sub>123</sub>-NP (14), to single chain  
194 gH/gL-NP or single chain gH/gL/gp42-NP stimulated effective gp350 directed Abs without  
195 reducing gH/gL or gH/gL/gp42 responses as shown previously for gp350D<sub>123</sub>-NP and gH/gL-NP  
196 or gH/gL/gp42-NP (15), suggesting that a bivalent vaccine formulation with both gp350 and  
197 gH/gL/gp42 components would provide improved coverage against the virus on different cell  
198 types. These neutralizing antibody responses were observed in ferrets, an EBV-naïve mammalian  
199 species. Importantly, in monkeys with pre-existing cross-reactive immunity to EBV due to prior  
200 infection by rhLCV, substantially higher titers of neutralizing antibodies were induced by  
201 immunization with these bivalent vaccines. In mice and NHPs, both single chain gH/gL-NP +  
202 gp350D<sub>123</sub>-NP and gH/gL/gp42-NP + gp350D<sub>123</sub>-NP bivalent vaccines induced neutralizing  
203 antibodies that inhibited EBV entry in B cells and epithelial cells. The neutralizing antibody  
204 levels (IC<sub>50</sub> titers) elicited by the bivalent vaccines were similar to those seen previously with  
205 combined gH/gL/gp42 + gp350 nanoparticle vaccines in other formats (15). Importantly, we  
206 show here that this immunity also protects against EBV infection and development of EBV  
207 lymphoma in vivo.

208 Evaluation of the protective efficacy of EBV vaccines is challenging as humans are the  
209 only natural reservoir for EBV. There are limitations in the animal models to evaluate EBV  
210 vaccine efficacy because EBV does not naturally infect rodents (*I*). In contrast, rhesus macaques  
211 are naturally infected almost universally by rhesus lymphocryptovirus (rhLCV) which is  
212 homologous to EBV; each of the rhLCV glycoproteins has an ortholog in EBV and antibodies to  
213 the rhLCV glycoproteins complicate EBV challenge studies. Furthermore, it is extremely  
214 difficult to obtain sufficient rhLCV seronegative NHPs for vaccination and challenge studies.  
215 Although vaccinated common marmosets have reduced EBV DNA in buccal fluid after EBV  
216 challenge (23), reduced shedding in oral fluids is not a useful test for efficacy of a vaccine. In  
217 addition, these animals are naturally infected with a marmoset homolog of EBV (*Callitrichine*  
218 *herpesvirus 3*) which has orthologs of EBV gH/gL/gp42 and gp350; thus, most common  
219 marmosets have antibodies to these glycoproteins that confound challenge studies. Finally,  
220 while rabbits can be infected with EBV, it requires non-physiologic, extremely high doses (20-80  
221 million copies of EBV) of virus to infect them (24).

222 Several laboratories have modeled EBV infection in humanized mice engrafted with  
223 CD34+ hematopoietic progenitor cells isolated from umbilical cord blood (CD34+ huNSG) (28)  
224 and have shown that these animals become viremic after infection (20). Here we used this model  
225 to validate protection against EBV viremia using our bivalent EBV vaccines by passive transfer  
226 of immune IgG from vaccinated mice. Nearly all CD34+ huNSG mice that received purified  
227 IgG from bivalent vaccinated animals displayed undetectable viremia after EBV challenge; in  
228 contrast,  $10^2$ - $10^3$  copies of EBV DNA/10  $\mu$ l of blood were present in animals that received  
229 control IgG. Successful protection was conferred by passive transfer of vaccine-induced  
230 antibodies. Because it is technically not possible to perform active immunization in a relevant

231 model of infection, we showed here that transfer of IgG obtained from serum alone conferred  
232 protection, demonstrating both the efficacy and mechanism of immune protection at the same  
233 time. There is ample precedent for the use of passive transfer to demonstrate vaccine-induced  
234 immune protection for other viruses (25-27). Similar to our previous report (15), both single  
235 chain gH/gL-NP and gH/gL/gp42-NP induced robust antibody responses that neutralized EBV  
236 entry to B cells and epithelial cells. The rationale to include gp42 is to mimic the natural  
237 heterotrimeric viral structure of the gH/gL/gp42 complex. This complex has been implicated in  
238 mediating B cell neutralization (4) and will be the lead candidate moving forward. Our approach  
239 ensures correct complex stoichiometry, simplifies protein production, minimizes heterogeneity,  
240 improves immunogen stability, and reduces manufacturing costs. Taken together, these data  
241 suggest that the single chain gH/gL/gp42 and gp350 bivalent vaccine represents an efficient,  
242 scalable candidate vaccine that is likely to limit viremia after EBV infection, thereby reducing  
243 infectious mononucleosis and possibly EBV associated cancers.

244

## 245 MATERIALS AND METHODS

### 246 Vector Construction.

247 The EBV glycoproteins gH, gL and gp42 amino acid sequences were obtained from  
248 NCBI GenPept with the following accession numbers: gH (Q3KSQ3.1), gL(P03212.1) and gp42  
249 (P0C6Z5.1). Through structural modeling, the glycoproteins were fused via a flexible amino acid  
250 linker to make a single chain gH/gL heterodimer or gH/gL/gp42 heterotrimer recombinant  
251 protein (Supplementary Table 2). A 6-histidine tag with a thrombin cleavage sequence was  
252 placed at the C-terminus of the single chain recombinant protein for affinity purification  
253 purposes. The EBV nanoparticle glycoproteins were generated by fusing the single-chain  
254 glycoproteins to the N-terminus of *Helicobacter pylori*- ferritin (14).

255

## 256 **Recombinant protein expression and purification**

257 Expi293F were transiently transfected using ExpiFectamine 293 reagent at a cell density  
258 of  $2 \times 10^6$  cells/ml with the gH/gL, gH/gL/gp42, gH/gL nanoparticle, gH/gL/gp42 nanoparticle, or  
259 gp350D<sub>123</sub> nanoparticle expression vector (Life Technologies). After 5 days of expression the  
260 supernatants were harvested for purification. The gH/gL or gH/gL/gp42 constructs were affinity  
261 tagged with a hexahistidine tag and was purified via Ni Sepharose 6 Fast Flow histidine-tagged  
262 protein purification resin (GE Healthsciences). Nickel column eluate was concentrated to  
263 approximately 10 mg/mL using 10 kDa cutoff centrifugal filters. This material was then subjected  
264 to gel filtration chromatography using a HiLoad 16/600 Superdex 200pg column that had been  
265 equilibrated in TBS buffer (20 mM Tris pH 7.4, 150 mM NaCl). Peak fractions containing pure  
266 fusion protein (as judged by SDS-PAGE) were pooled and concentrated back to approximately 10  
267 mg/mL. This sample was then deglycosylated by adding PNGase F enzyme at a ratio of 5 units  
268 PNGase F per  $\mu\text{g}$  of fusion protein and incubated at room temperature for 72 hours. PNGase F was  
269 then removed by gel filtration over a Superose 6 10/300 GL column equilibrated in TBS, pooling  
270 non-void fractions containing the fusion protein, but not PNGase F. These fractions were  
271 concentrated to 7.5 mg/mL and stored at 4°C. The nanoparticles were purified via ion exchange  
272 chromatography (20 mM Tris-HCl pH 7.5, 50 mM NaCl), followed by Superose 6 10/300gL size  
273 exclusion chromatography filtration column in PBS (GE Healthsciences). SDS-PAGE and western  
274 blots were performed to detect the presence of the nanoparticles (Biorad). Endotoxin analyses  
275 ensured that all vaccine doses contained  $<0.1$  EU per mouse.

## 276 **Crystallization and cryoprotection**

277 Crystallization was carried out by sitting drop vapor diffusion at 18°C against a solution  
278 of 0.1 M Bis-Tris pH 5.5, 0.375 M ammonium sulfate, and 19.5% PEG 3350 for single-chain

279 gH/gL/gp42 and 1M LiCl, 10% PEG 6k, 0.1M Na<sub>3</sub>Citrate pH 5.0 for single-chain gH/gL. Drops  
280 (200 nL total volume) were set up at a 1:1 ratio of protein stock (7.5 mg/mL) and crystallization  
281 solutions. Crystals were cryo-protected by transfer into a fresh drop of the crystallization  
282 solution supplemented to 25% glycerol and incubated for 10 s immediately prior to freezing in  
283 liquid N<sub>2</sub>. X-ray diffraction data for single chain gH/gL were collected at the Advanced Photon  
284 Source beamline LS-CAT 21-ID-D and on an EigerX 9M Detector (wavelength 1.1 Å). X-ray  
285 diffraction data for single chain gH/gL/gp42 were collected at Diamond Light Source beamline  
286 i24 on a Pilatus 3 6M detector (wavelength 0.9686 Å). Both datasets were indexed, integrated  
287 and scaled using XDS (29, 30). Initial phases were obtained by molecular replacement with  
288 Phaser (31, 32) using the 3PHF structure for single chain gH/gL and the gH/gL/gp42 domains of  
289 5W0K for single chain gH/gL/gp42. Structures were modeled and refined using the programs  
290 COOT (33) and PHENIX (34).

### 291 **Negative stain transmission electron microscopy**

292 1 mg/mL of nanoparticle samples were sent to the Harvard Medical School Electron Microscopy  
293 Facility for negative stain transmission electron microscopy. The samples were stained with  
294 0.75% uranyl formate and a TecnaiG<sup>2</sup> Spirit BioTWIN microscope was used to image the grids.  
295 The images were recorded with an AMT 2k charge-coupled device camera.

### 296 **Immunization**

297 Animal experiments were carried out in accordance with all federal regulations and were approved  
298 by the Sanofi Institutional Animal Care and Use Committee in fully AAALAC accredited  
299 facilities. Six- to eight-week old female BALB/c mice (Sanofi in house) were immunized (n=5)  
300 intramuscularly with purified proteins either in the absence or presence of Sanofi Pasteur AF03  
301 adjuvant at 50% (v/v) formulation. 1 µg gH/gL or 1 µg gH/gL/gp42 nanoparticles plus 1 µg of

302 naked ferritin nanoparticle vaccine were given intramuscularly to each mouse. The bivalent  
303 formulation comprised 1  $\mu\text{g}$  gH/gL or 1  $\mu\text{g}$  gH/gL/gp42 nanoparticle plus 1  $\mu\text{g}$  gp350D<sub>123</sub>  
304 nanoparticle vaccine. Immunizations were given at weeks 0 and 3. Sera were collected -2 days  
305 before immunization, and then at week 2, 5, and 8 post- immunizations. The animal studies with  
306 gH/gL and gH/gL/gp42 were performed in separate, independent experiments. Given the limited  
307 amount of sera available from these mice, it was technically not possible to perform neutralization  
308 assays for a head-to-head comparison.

309 Ferrets and NHP studies were carried out in accordance with the recommendations of the Association  
310 for Assessment and Accreditation of Laboratory Animal Care International Standards and with the  
311 recommendations in the Guide for the Care and Use of Laboratory Animals of the United States—  
312 National Institutes of Health. The Institutional Animal Use and Care Committee of BIOQUAL  
313 approved these experiments. Ferrets (n=6/group) were injected intramuscularly with 15  $\mu\text{g}$  gH/gL  
314 or 15  $\mu\text{g}$  gH/gL/gp42 nanoparticles plus 15  $\mu\text{g}$  gp350D<sub>123</sub> nanoparticle vaccine in the presence of  
315 Sanofi Pasteur AF03 adjuvant at 50% (v/v) formulation at weeks 0 and 4. Sera were analyzed at  
316 weeks 0, 2, and 6. All rhesus macaques are considered rhLCV-seropositive as pre-immune sera  
317 showed high background against gH/gL and gH/gL/gp42 and residual activity against gp350  
318 (Supplemental Figure 6). Rhesus macaques (n=4/group) were injected intramuscularly with 25  $\mu\text{g}$   
319 gH/gL or 25  $\mu\text{g}$  gH/gL/gp42 nanoparticles plus 25  $\mu\text{g}$  dose of gp350D<sub>123</sub> nanoparticle vaccine in  
320 the presence of Sanofi Pasteur AF03 adjuvant at 50% (v/v) formulation at weeks 0, 4, and 10. Sera  
321 were analyzed at weeks -1, 2, 6, 8, and 12.

### 322 **Enzyme-linked immunosorbent assay**

323 Plates were coated with antigens at 100 ng/well in PBS and incubated at 4°C overnight.  
324 The plates were then washed five times in PBS-T and blocked with buffer containing 5% milk  
325 (Difco #232100) and 1% BSA (Sigma #A906-500G) in PBS-T (BioVision #2310-100). Serial

326 dilutions of serum were made in 2.5% milk and 0.5% BSA in PBS-T. The diluted sera were added  
327 to the plate and incubated for 1 hour at room temp before being washed five times in PBS-T. Anti-  
328 mouse-HRP secondary (GE NA931V), anti-NHP-HRP secondary (Invitrogen), or HRP anti-ferret  
329 IgG (LS Bio LS-C61236-1) were added to the plate, and incubated for 1 hour at room temperature.  
330 The plate was washed five times and Sure Blue Substrate (KPL #52-00-00) was added at 100  
331  $\mu\text{L}/\text{well}$ . Once color was visualized, the reaction was stopped by adding 100  $\mu\text{L}$  of 1N  $\text{H}_2\text{SO}_4$  and  
332 a Spectramax M5 plate reader was used to measure absorbency at 450nm.

### 333 **GFP reporter virus neutralization assay**

334 Immune sera from vaccinated mice, ferrets, or monkeys were serial diluted and incubated  
335 with B95-8/F EBV GFP-reporter virus for 2 hours. The mixture was added to Raji B cells, SVK  
336 CR2 or 293 epithelial cells and incubated for 3 days (15). Cells were then washed and fixed for  
337 flow cytometry to measure for GFP-positive cells

### 338 **Quantification of antibody titers in plasma by luciferase immunoprecipitation system assay**

339 EBV gp350, gH/gL, and gp42 antibody titers in the week 1 post EBV challenge plasma  
340 samples were measured by luciferase immunoprecipitation system (LIPS) assay as previously  
341 described (35, 36). Briefly, cell lysates expressing EBV gp350, gH/gL, or gp42 Renilla luciferase  
342 fusion proteins were incubated with plasma from week 1 post infection for 1 hr and  
343 immunoprecipitated with protein A/G beads for 1 hr. Coelenterazine substrate was added to each  
344 well and luciferase activity was measured in light units (LU) by a luminometer. Each sample was  
345 tested in duplicate. The inoculum for the passive transfer in vivo study, purified IgG from single  
346 chain gH/gL-NP+gp350D<sub>123</sub>-NP or single chain gH/gL/gp42-NP+gp350D<sub>123</sub>-NP immunized  
347 BALB/c mice, was serially diluted and used to generate a standard curve. Plasma from mice 1  
348 week post EBV challenge that received purified IgG from naïve BALB/C mice were included in



349 each plate as a negative control. LU values that were in the linear range of a standard curve were  
350 converted to antibody titers in the plasma by interpolating a standard curve using GraphPad  
351 PRISM software.

### 352 **Passive transfer EBV challenge study**

353 Humanized mouse experiments were carried out in accordance with federal regulations and  
354 NIH guidelines and were approved by the Animal Care and Use Committee of the National  
355 Institute of Allergy and Infectious Diseases. Three groups of BALB/c mice (n=80/group) were  
356 immunized with 5 µg gH/gL or 5 µg gH/gL/gp42 nanoparticle plus 5 µg dose of gp350D<sub>123</sub> in the  
357 presence of AF03 adjuvant at weeks 0, 3 and 7 to induce an antibody response. Sera from each of  
358 the vaccinated BALB/C groups were pooled at weeks 4, 5, 8, 9, and 10 for mouse IgG purification.  
359 The control group was unimmunized BALB/c mice; similar non-immune sera have often been  
360 used as a negative control in previous publications (37, 38). Purified mIgG from each group was  
361 passively transferred to CD34<sup>+</sup> humanized NSG mice (Jackson Laboratory) intraperitoneally at  
362 20 µg of mIgG per gram of mouse at day -1, day 0, and day 1. The mice were challenged  
363 intravenously at day 0 with 10<sup>5</sup> Green Raji Units of EBV. Mice were weighed weekly. EBV  
364 viremia was measured using qPCR to detect the viral gene BamH1 W (39) in the blood at week  
365 5, 7, 9, 14, and 18.

### 366 **Dynamic light scattering**

367 DLS measurements were performed at 25°C using a DynaPro Plate Reader II (Wyatt  
368 Technology). The samples were diluted in PBS, adjusted to 0.01 mg/mL concentration for each  
369 measurement. The average particle size was quantified from ten measurements.

### 370 **Immunohistochemistry**

371 Tissues from mice were collected 27 weeks after EBV challenge and fixed in 10% neutral-  
372 buffered formalin. Sections were stained with hematoxylin and eosin, antibody to human CD20  
373 followed by 3,3' diaminobenzidine as a chromogen, and in situ hybridization was performed using  
374 a riboprobe for EBV EBER1. Sections were coded and read by a pathologist in a blinded fashion.

### 375 **Statistics**

376 *P*-values were derived by Student's *t* test or Fisher's exact test with GraphPad PRISM  
377 version 9.3.

378 **Funding:** this study was funded by Sanofi R&D and the Intramural Research Program of the  
379 National Institute of Allergy and Infectious Diseases.

380 **Acknowledgements** We thank all members of Sanofi Breakthrough Lab for insightful  
381 discussions throughout this study. We thank Hanne Andersen Elyard, Laurent Pessaint and Jake  
382 Yalley from Bioqual for assistance with Ferret and NHP studies. We thank Harvard Medical  
383 School Electron Microscopy Facility for negative stain transmission electron microscopy. We  
384 thank Amy Sullivan, Kelly Balko, and the Sanofi Comparative Medicine group for help with the  
385 mouse immunogenicity studies,

386 **Author contributions:** C.-J. W., W.B., L.A.N., J.I.C., and G.J.N. designed research studies;  
387 L.A.N., W.B., J.D.B, R.K., S.P.; J.R.F., T.-H.C. performed the research; L.A.N., C.-J. W., W.B.,  
388 J.D.B., R.K., S.P.; J.R.F., J.I.C., and G.J.N. interpreted and discussed the data; C.-J. W., W.B.,  
389 L.A.N., J.I.C., and G.J.N. wrote the paper and all authors participated in manuscript revisions.

390 **Competing interests:** At the time the research described in this paper was initiated, L.A.N., C.-  
391 J. W., J.D.B., J.R.F., T.-H. C. and G.J.N. were employees of Sanofi which has filed patent  
392 applications on EBV vaccines. C.J.W. and G.J.N. are inventors of nanoparticle-based vaccines  
393 that have been filed by either Sanofi or the U.S. government. W.B and J.I.C. are current

394 employees of U.S. government which has issued patents on ferritin-nanoparticle based EBV  
395 vaccines.

396 **Data and materials availability:** All data is available in the main text or the supplementary  
397 materials.

398 **Supplementary Materials (on a separate file):**

399 Materials and Methods

400 Figs. S1 to S9

401 Tables S1 to S2

402

403  
404  
405  
406  
407  
408  
409  
410  
411  
412  
413  
414  
415  
416  
417  
418  
419  
420  
421  
422  
423  
424  
425

## FIGURES LEGENDS

**Figure 1. Structure-based design of single chain gH/gL and single chain gH/gL/gp42 nanoparticles.** (A) A schematic representation of the single chain gH/gL, single chain gH/gL/gp42, single chain gH/gL-NP, and single chain gH/gL/gp42-NP. EBV gL (green) is fused to the N terminus of gH (cyan) via a flexible amino acid linker (indicated by the black line between gL and gH). EBV gp42 (gray) is fused to the C-terminus of gH. Single chain gH/gL-NP or single chain gH/gL/gp42-NP constructs show the gH/gL or gH/gL/gp42 fused to *H. pylori* ferritin (represented by the letter “F” in beige) by a flexible amino acid linker (line), respectively. (B) Left: The crystal structure of the single chain gH/gL was resolved at 5.5Å (gL in green and gH in cyan) with superposition of the previously solved crystal structure of gH/gL complex (white, PDB: 3PHF) (RMS = 0.33). Right: The crystal structure of the single chain gH/gL/gp42 was resolved at 2.9Å and superposition with the previously solved heterotrimer gH/gL/gp42 complex crystal structure (white, PDB: 5T1D) (RMS value = 0.96). (C) Left: Size exclusion chromatography (SEC) elution profiles of single chain gH/gL-NP and single chain gH/gL/gp42-NP. Right: Size of single chain gH/gL-NP and single chain gH/gL/gp42-NP determined by DLS. (D) Negative stain EM image of single chain gH/gL-NP and single chain gH/gL/gp42-NP. A close-up image of the nanoparticle is displayed at the upper right corner. A structural model of the single chain gH/gL-NP or single chain gH/gL/gp42-NP is shown on the right of the EM image (gH: cyan; gL: green; gp42: gray; ferritin: orange). The surface density is a model built from crystal structures solved in panel B and ferritin core from PDB 3BVE (DOI:[10.2210/pdb3bve/pdb](https://doi.org/10.2210/pdb3bve/pdb)) using Chimera (40) and is not reconstructed from EM.

426 **Figure 2. Neutralization responses induced by single chain gH/gL-NP or single chain**  
427 **gH/gL/gp42-NP alone or in combination with gp350D<sub>123</sub>-NP in mice.**

428 BALB/C mice (n=5/group) were immunized intramuscularly in the presence of AF03  
429 adjuvant at weeks 0 and 3 with 1µg of (A) monovalent single chain gH/gL-NP, gp350D<sub>123</sub> or  
430 bivalent gH/gL-NP+gp350D<sub>123</sub>-NP or (B) monovalent single chain gH/gL/gp42-NP or bivalent  
431 gH/gL/gp42-NP+gp350D<sub>123</sub>-NP. Control is pre-immune sera. Neutralization antibody titers  
432 from immune sera collected 2 weeks after the 2<sup>nd</sup> injection was determined in Raji B cells and  
433 SVK CR2 epithelial cells. The IC<sub>50</sub> indicated the log titer that resulted in 50% inhibition of EBV  
434 entry into target cells. The data are shown as box-and-whiskers plots (box indicates lower and  
435 upper quartiles with line at median, and whiskers span minimum and maximum data points;  
436 \*p<0.05 compared to control).

437

438 **Figure 3. Immunogenicity of single chain gH/gL-NP+gp350D<sub>123</sub>-NP or single chain**  
439 **gH/gL/gp42-NP alone or in combination with gp350D<sub>123</sub>-NP in ferrets and NHP.**

440 (A) Ferrets were immunized intramuscularly at weeks 0 and 4 with either 15 µg single  
441 chain gH/gL-NP + 15 µg gp350D<sub>123</sub>-NP or 15 µg single chain gH/gL/gp42-NP + 15 µg gp350D<sub>123</sub>-  
442 NP bivalent vaccines. Sera were collected 2 weeks after immunization and were assayed for  
443 neutralizing activity in both Raji B cells (left) and 293 epithelial cells (right). Means and standard  
444 deviations are shown (\* p< 0.05 compared to pre-immune sera). No neutralizing activity was  
445 detected from the pre-immune sera and levels were at the limit of detection in the graphs. (B)  
446 Rhesus macaques (n=4/group) were vaccinated with the bivalent vaccine composed of 25µg  
447 gH/gL-NP + 25µg gp350D<sub>123</sub>-NP or 25µg gH/gL/gp42-NP + 25µg gp350D<sub>123</sub>-NP at weeks 0, 4,  
448 and 10. AF03 was used as adjuvant. Immune sera were collected 2 weeks after the 3<sup>rd</sup> injection

449 and neutralizing antibody titers were determined in both Raji B cells and SVK CR2 epithelial cells.  
450 Means and standard deviations are shown (\*  $p < 0.05$  compared to pre-immune sera).

451

452 **Figure 4. Immune protection by passive transfer of bivalent vaccine sera against EBV**  
453 **infection in humanized NSG mice.**

454 Humanized NSG mice ( $n=6$ /group) were injected IgG ( $20\mu\text{g/g}$  of mouse body weight)  
455 purified from naïve (control), single chain gH/gL-NP+ gp350D<sub>123</sub>-NP or single chain  
456 gH/gL/gp42+gp350D<sub>123</sub>-NP immunized BALB/C mice. Passive transfer of IgG was delivered  
457 intraperitoneally on day -1, 0 and 1 and EBV challenge was performed intravenously on day 0.

458 **(A)** Viremia from each group was measured at weeks 5, 7, and 9 post challenge. Medians with 25%  
459 and 75% percentiles are shown (\*  $p < 0.05$  compared to control at the same week). **(B)** Heatmap  
460 showing EBV encoded RNA 1 (EBER1) positivity of tissues (graded 0 to 3) from mice receiving  
461 IgG from naïve, single chain gH/gL-NP+ gp350D<sub>123</sub>-NP, or single chain gH/gL/gp42+gp350D<sub>123</sub>-  
462 NP immunized BALB/C mice after challenge with EBV. A score of 0 indicates no EBER1 staining  
463 while a score of 3 indicates marked infiltration of tissues by EBER1-positive cells.

464

465 **Figure 5. Protection against EBV lymphoma *in vivo*.**

466 Pathologic and immunohistochemical analysis of the liver from representative mice  
467 receiving IgG from non-immune (Control, left) or vaccinated mice (Immune, middle and right)  
468 after challenge with EBV. Tissues were collected 27 weeks after challenge and stained with  
469 hematoxylin and eosin (H&E, yellow arrows indicate representative region with lymphoma) or  
470 anti-CD20 antibody (brown staining, red arrows), or in situ hybridization was performed with a  
471 probe to EBER1 (purple staining, red arrows). CD20 and EBER staining are apparent in control,

472 but not in any of the tissues receiving IgG from vaccinated mice. No EBV-positive B cell  
473 lymphomas were observed in the latter animals.

474

475 **Table S1. Data collection and refinement statistics (molecular replacement)**

|                                     | Single chain gH/gL/gp42           | Single chain gH/gL/          |
|-------------------------------------|-----------------------------------|------------------------------|
| <b>Data collection</b>              |                                   |                              |
| Space group                         | P 21 21 21                        | C2                           |
| Cell dimensions                     |                                   |                              |
| <i>a, b, c</i> (Å)                  | 89.85, 120.94, 143.65             | 543.4, 167.4, 383.6          |
| $\alpha, \beta, \gamma$ (°)         | 90 90 90                          | 90 134 90                    |
| Resolution (Å)                      | 89.85 - 2.87 (2.94 - 2.87)        | 195 - 5.5 (5.52 - 5.5)       |
| $R_{\text{merge}}$                  | 0.148 (2.024)                     | 0.095 (1.26)                 |
| $R_{\text{meas}}$                   | 0.161 (2.202)                     | 0.116 (1.42)                 |
| $I / \sigma I$                      | 9.2 (1.0)                         | 8.2 (1.0)                    |
| $CC_{1/2}$                          | 0.997 (0.401)                     | 0.992 (0.329)                |
| Completeness (%)                    | 99.9 (100.0)                      | 97.9 (92.7)                  |
| Redundancy                          | 6.4 (6.5)                         | 3.9 (3.4)                    |
| <b>Refinement</b>                   |                                   |                              |
| Resolution (Å)                      | 61.76 - 2.87 (2.973 - 2.87)       | 136.2 - 5.5 (5.64 - 5.5)     |
| No. reflections                     | 36423 (3580)                      | 76750 (5476)                 |
| $R_{\text{work}} / R_{\text{free}}$ | 0.2241 / 0.2520 (0.3500 / 0.4206) | 0.299 / 0.338 (0.38 / 0.395) |
| No. atoms                           | 7437                              | 85882                        |
| Protein                             | 7293                              | 85882                        |
| Ligand/ion                          | 144                               | 0                            |
| Water                               | 0                                 | 0                            |
| <i>B</i> -factor                    | 85.83                             | 279.3                        |
| Protein                             | 84.86                             | 279.3                        |
| Ligand/ion                          | 119.27                            | N/A                          |
| Ramachandran                        |                                   |                              |
| Favored (%)                         | 96.62                             | 92.9                         |
| Allowed (%)                         | 3.38                              | 6.72                         |
| Outlier (%)                         | 0.00                              | 0.28                         |
| R.m.s. deviations                   |                                   |                              |
| Bond lengths (Å)                    | 0.002                             | 0.002                        |
| Bond angles (°)                     | 0.48                              | 1.220                        |
| Molprobit                           |                                   |                              |
| Clashscore                          | 2.78                              | 10.79                        |
| Rotamer outliers (%)                | 0.99                              | 2.2                          |
| C $\beta$ deviations                | 0                                 | 0.03                         |
| Cis-proline (%)                     | 0.00                              | 0.00                         |
| Twisted proline (%)                 | 0.00                              | 0.21                         |

476 \*Values in parentheses refer to the highest-resolution shell.

477

478

479

480

481

482

483

484

485

486



487 Table S2. Amino acid sequences of constructs used

| Construct                     | <p>Key:<br/>                     Leader Sequence – <u>underlined</u><br/>                     gL – <i>Italicized</i><br/>                     Linker – <u>double underlined</u><br/>                     gH – <b>Bold</b><br/>                     bfpFerr (ferritin) – <u>wavy underline</u><br/>                     gp350D<sub>123</sub> – <i>Italicized and bold</i><br/>                     gp42 – <i>Italicized and underlined</i><br/>                     Thrombin cleavage site: <u>Italicized and dashed underline</u><br/>                     6X His Tag: <b><i>Bold, italicized and curvy underline</i></b></p>                                                                                                                                                                                                                                                                                                                                                                                                                                                                                                                                                                                                                                                                                                                                                                                                                                                                                                                                                                                                                                                                                                                                                                                                                                                                                                                                                                                                                                                                                                                                                                                                                                                                                                                                                                                                                                                                                                                                                                                                                                                                                                                                                                                                                                                                                                                                                                                                                                                                                                                                                                                                                                                                                                                                                                                                                                                                                                                                                                                                                                                                                                                                                                                                                                                                                                                                                                                                                                                                                                                                                                                                                                                                                                                                                                                                                                                                                                                                                                                                                                                                                                                                                                                                                                                                                                                                                                                                                                                                                                                                                                                                                                                                                                                                                                                                                                                                                                                                                                                                                                                                                                                                                                                                                                 |
|-------------------------------|---------------------------------------------------------------------------------------------------------------------------------------------------------------------------------------------------------------------------------------------------------------------------------------------------------------------------------------------------------------------------------------------------------------------------------------------------------------------------------------------------------------------------------------------------------------------------------------------------------------------------------------------------------------------------------------------------------------------------------------------------------------------------------------------------------------------------------------------------------------------------------------------------------------------------------------------------------------------------------------------------------------------------------------------------------------------------------------------------------------------------------------------------------------------------------------------------------------------------------------------------------------------------------------------------------------------------------------------------------------------------------------------------------------------------------------------------------------------------------------------------------------------------------------------------------------------------------------------------------------------------------------------------------------------------------------------------------------------------------------------------------------------------------------------------------------------------------------------------------------------------------------------------------------------------------------------------------------------------------------------------------------------------------------------------------------------------------------------------------------------------------------------------------------------------------------------------------------------------------------------------------------------------------------------------------------------------------------------------------------------------------------------------------------------------------------------------------------------------------------------------------------------------------------------------------------------------------------------------------------------------------------------------------------------------------------------------------------------------------------------------------------------------------------------------------------------------------------------------------------------------------------------------------------------------------------------------------------------------------------------------------------------------------------------------------------------------------------------------------------------------------------------------------------------------------------------------------------------------------------------------------------------------------------------------------------------------------------------------------------------------------------------------------------------------------------------------------------------------------------------------------------------------------------------------------------------------------------------------------------------------------------------------------------------------------------------------------------------------------------------------------------------------------------------------------------------------------------------------------------------------------------------------------------------------------------------------------------------------------------------------------------------------------------------------------------------------------------------------------------------------------------------------------------------------------------------------------------------------------------------------------------------------------------------------------------------------------------------------------------------------------------------------------------------------------------------------------------------------------------------------------------------------------------------------------------------------------------------------------------------------------------------------------------------------------------------------------------------------------------------------------------------------------------------------------------------------------------------------------------------------------------------------------------------------------------------------------------------------------------------------------------------------------------------------------------------------------------------------------------------------------------------------------------------------------------------------------------------------------------------------------------------------------------------------------------------------------------------------------------------------------------------------------------------------------------------------------------------------------------------------------------------------------------------------------------------------------------------------------------------------------------------------------------------------------------------------------------------------------------------------------------------------------------------------------------------------------------------------------------|
| gp350D <sub>123</sub> monomer | <p><u>MDSK</u><u>GSSQKGS</u><u>RLLLLLV</u><u>SNLLL</u><u>PQGV</u><u>LAE</u><u>AALL</u><u>VCQYTIQSLIHLTGEDPGFFNV</u><br/> <i>EIPEFPFYPTCNVCTADVNV</i><u>TINFDVGGKKHQLDLDFGQLTPHTKAVYQPRGAFGG</u><br/> <i>ENATNLFLELLGAGELAL</i><u>TMR</u><u>SKKLP</u><u>INVT</u><u>TGEE</u><u>QQV</u><u>SLES</u><u>VDVY</u><u>FQDV</u><u>FGT</u><u>MWC</u><br/> <i>HHAEMQNPVYLIPETVPYIKWDNCNSTNITAVVRAQGLDVTPLPSLPTSAQDSNFSV</i><br/> <i>KTEMLGNEIDIECIMEDGEISQVLP</i><u>GD</u><u>NKFNIT</u><u>CSGY</u><u>ESHV</u><u>PSGG</u><u>ILT</u><u>STSP</u><u>VAT</u><u>PIPG</u><br/> <i>TGYAYSRLRTPRPVSRFLGNSILYVFYSGNGPKASGGDYCIQSNIVFSDEIPASQDMP</i><br/> <i>TNTTDITYVGDNATYSVPMVTSE</i><u>DAN</u><u>SP</u><u>NVT</u><u>VTA</u><u>FWA</u><u>WP</u><u>NN</u><u>TET</u><u>DFK</u><u>CK</u><u>W</u><u>TL</u><u>TS</u><u>GT</u><br/> <u>PSGCENISGAFASNRTFDITVSGLTAPKTLIITRTATNATTTTHKVIFSKAPEGSGSGS</u><br/> <u>GLVPRGSGAGGGHHHHH</u></p>                                                                                                                                                                                                                                                                                                                                                                                                                                                                                                                                                                                                                                                                                                                                                                                                                                                                                                                                                                                                                                                                                                                                                                                                                                                                                                                                                                                                                                                                                                                                                                                                                                                                                                                                                                                                                                                                                                                                                                                                                                                                                                                                                                                                                                                                                                                                                                                                                                                                                                                                                                                                                                                                                                                                                                                                                                                                                                                                                                                                                                                                                                                                                                                                                                                                                                                                                                                                                                                                                                                                                                                                                                                                                                                                                                                                                                                                                                                                                                                                                                                                                                                                                                                                                                                                                                                                                                                                                                                                                                                                                                                                                                                                                                                                                                                                                                                                                                                                                |
| gH/gL monomer                 | <p><u>MRA</u><u>VG</u><u>VFLA</u><u>IC</u><u>LV</u><u>TIF</u><u>VL</u><u>PT</u><u>W</u><u>GN</u><u>W</u><u>AY</u><u>PC</u><u>CH</u><u>VT</u><u>Q</u><u>L</u><u>R</u><u>A</u><u>Q</u><u>H</u><u>L</u><u>L</u><u>A</u><u>E</u><u>N</u><u>I</u><u>S</u><u>D</u><u>I</u><u>Y</u><u>L</u><u>V</u><u>S</u><u>N</u><u>Q</u><u>T</u><u>C</u><u>D</u><u>G</u><u>F</u><u>S</u><br/> <i>LASLNSPKNGSNQLVISRCANGLNVVFFISILKRSSALTGHLRELLTTLETLYGSFV</i><u>EDLF</u><br/> <i>GANLNRYAWHRGGGGSGSGSNSSASSGASSGGASGGSGGSGAASLSEVKLHLDIEG</i><br/> <i>HASHYTIPWTELM</i><u>AKV</u><u>P</u><u>GL</u><u>S</u><u>P</u><u>E</u><u>A</u><u>L</u><u>W</u><u>R</u><u>E</u><u>A</u><u>N</u><u>V</u><u>T</u><u>E</u><u>D</u><u>L</u><u>A</u><u>S</u><u>M</u><u>L</u><u>N</u><u>R</u><u>Y</u><u>K</u><u>L</u><u>I</u><u>Y</u><u>K</u><u>T</u><u>S</u><u>G</u><u>T</u><u>L</u><u>G</u><u>I</u><u>A</u><br/> <i>LAEPVDIPAVSEGS</i><u>M</u><u>Q</u><u>V</u><u>D</u><u>A</u><u>S</u><u>K</u><u>V</u><u>H</u><u>P</u><u>G</u><u>V</u><u>I</u><u>S</u><u>G</u><u>L</u><u>N</u><u>S</u><u>P</u><u>A</u><u>C</u><u>M</u><u>L</u><u>S</u><u>A</u><u>P</u><u>L</u><u>E</u><u>K</u><u>Q</u><u>L</u><u>F</u><u>Y</u><u>I</u><u>G</u><u>T</u><u>M</u><u>L</u><u>P</u><u>N</u><br/> <i>TRPHSYV</i><u>F</u><u>Y</u><u>Q</u><u>L</u><u>R</u><u>C</u><u>H</u><u>L</u><u>S</u><u>V</u><u>A</u><u>L</u><u>S</u><u>I</u><u>N</u><u>G</u><u>D</u><u>K</u><u>F</u><u>Q</u><u>Y</u><u>T</u><u>G</u><u>A</u><u>M</u><u>T</u><u>S</u><u>K</u><u>F</u><u>L</u><u>M</u><u>G</u><u>T</u><u>Y</u><u>K</u><u>R</u><u>V</u><u>T</u><u>E</u><u>K</u><u>G</u><u>D</u><u>E</u><u>H</u><u>V</u><br/> <i>LSLVFGKTKDL</i><u>P</u><u>D</u><u>L</u><u>R</u><u>G</u><u>P</u><u>F</u><u>S</u><u>P</u><u>S</u><u>L</u><u>T</u><u>S</u><u>A</u><u>Q</u><u>S</u><u>G</u><u>D</u><u>Y</u><u>S</u><u>L</u><u>V</u><u>I</u><u>V</u><u>T</u><u>T</u><u>F</u><u>V</u><u>H</u><u>Y</u><u>A</u><u>N</u><u>F</u><u>H</u><u>N</u><u>Y</u><u>F</u><u>V</u><u>P</u><u>N</u><u>L</u><u>K</u><u>D</u><br/> <i>MFSRAVTMTAASYARYVLQKLV</i><u>L</u><u>E</u><u>M</u><u>K</u><u>G</u><u>G</u><u>C</u><u>R</u><u>E</u><u>P</u><u>E</u><u>L</u><u>D</u><u>T</u><u>E</u><u>T</u><u>L</u><u>T</u><u>M</u><u>F</u><u>E</u><u>V</u><u>S</u><u>V</u><u>A</u><u>F</u><u>F</u><u>K</u><u>V</u><br/> <i>GHAVGETGNGCVDLRWLAKS</i><u>F</u><u>F</u><u>E</u><u>L</u><u>T</u><u>V</u><u>L</u><u>K</u><u>D</u><u>I</u><u>I</u><u>G</u><u>I</u><u>C</u><u>Y</u><u>G</u><u>A</u><u>T</u><u>V</u><u>K</u><u>G</u><u>M</u><u>Q</u><u>S</u><u>Y</u><u>G</u><u>L</u><u>E</u><u>R</u><u>L</u><u>A</u><u>A</u><u>M</u><br/> <i>LMATVKMEELGHLTTEKQEYALRLATVGYPKAGVY</i><u>S</u><u>G</u><u>L</u><u>I</u><u>G</u><u>G</u><u>A</u><u>T</u><u>S</u><u>V</u><u>L</u><u>L</u><u>S</u><u>A</u><u>Y</u><u>N</u><u>R</u><u>H</u><br/> <i>PLFQPLHTVMRETLFIGSHVVLRELRLNVTTQGNLALYQLL</i><u>S</u><u>T</u><u>A</u><u>L</u><u>C</u><u>S</u><u>A</u><u>L</u><u>E</u><u>I</u><u>G</u><u>E</u><u>V</u><br/> <i>LRGLALGTESGLFSPCYLSL</i><u>R</u><u>F</u><u>D</u><u>L</u><u>T</u><u>R</u><u>D</u><u>K</u><u>L</u><u>L</u><u>S</u><u>M</u><u>A</u><u>P</u><u>Q</u><u>E</u><u>A</u><u>T</u><u>L</u><u>D</u><u>Q</u><u>A</u><u>A</u><u>V</u><u>S</u><u>N</u><u>A</u><u>V</u><u>D</u><u>G</u><u>F</u><u>L</u><u>G</u><u>R</u><br/> <i>LSLEREDRD</i><u>A</u><u>W</u><u>H</u><u>L</u><u>P</u><u>A</u><u>Y</u><u>K</u><u>C</u><u>V</u><u>D</u><u>R</u><u>L</u><u>D</u><u>K</u><u>V</u><u>L</u><u>M</u><u>I</u><u>P</u><u>L</u><u>I</u><u>N</u><u>V</u><u>T</u><u>F</u><u>I</u><u>S</u><u>S</u><u>D</u><u>R</u><u>E</u><u>V</u><u>R</u><u>G</u><u>S</u><u>A</u><u>L</u><u>Y</u><u>E</u><u>A</u><u>S</u><u>T</u><u>T</u><u>Y</u><br/> <i>LSSSLFLSPVIMNKCSQGAVAGEPRQIPKIQN</i><u>F</u><u>T</u><u>R</u><u>T</u><u>Q</u><u>K</u><u>S</u><u>C</u><u>I</u><u>F</u><u>C</u><u>G</u><u>F</u><u>A</u><u>L</u><u>L</u><u>S</u><u>Y</u><u>D</u><u>E</u><u>K</u><u>E</u><u>G</u><u>L</u><br/> <i>ETTTYITSQEVQNSILSSNYDFDNLHVHYLLLT</i><u>N</u><u>G</u><u>T</u><u>V</u><u>M</u><u>E</u><u>I</u><u>A</u><u>G</u><u>L</u><u>Y</u><u>E</u><u>E</u><u>R</u><u>A</u><u>S</u><u>G</u><u>S</u><u>G</u><u>S</u><br/> <u>GSGLVPRGSGAGGGHHHHH</u></p>                                                                                                                                                                                                                                                                                                                                                                                                                                                                                                                                                                                                                                                                                                                                                                                                                                                                                                                                                                                                                                                                                                                                                                                                                                                                                                                                                                                                                                                                                                                                                                                                                                                                                |
| gL/gH/gp42 monomer            | <p><u>MRA</u><u>VG</u><u>VFLA</u><u>IC</u><u>LV</u><u>TIF</u><u>VL</u><u>PT</u><u>W</u><u>GN</u><u>W</u><u>AY</u><u>PC</u><u>CH</u><u>VT</u><u>Q</u><u>L</u><u>R</u><u>A</u><u>Q</u><u>H</u><u>L</u><u>L</u><u>A</u><u>E</u><u>N</u><u>I</u><u>S</u><u>D</u><u>I</u><u>Y</u><u>L</u><u>V</u><u>S</u><u>N</u><u>Q</u><u>T</u><u>C</u><u>D</u><u>G</u><u>F</u><u>S</u><br/> <i>LASLNSPKNGSNQLVISRCANGLNVVFFISILKRSSALTGHLRELLTTLETLYGSFV</i><u>EDLF</u><br/> <i>GANLNRYAWHRGGGGSGSGASSGASASGSSNGSGSGSGSNSSASSGASSGGASGGSGG<br/> <u>SGAASLSEVKLHLDIEGHASHYTIPWTELM</u><u>AKV</u><u>P</u><u>GL</u><u>S</u><u>P</u><u>E</u><u>A</u><u>L</u><u>W</u><u>R</u><u>E</u><u>A</u><u>N</u><u>V</u><u>T</u><u>E</u><u>D</u><u>L</u><u>A</u><u>S</u><u>M</u><br/> <u>LNRYKLIYKTS</u><u>G</u><u>T</u><u>L</u><u>G</u><u>I</u><u>A</u><u>L</u><u>A</u><u>E</u><u>P</u><u>V</u><u>D</u><u>I</u><u>P</u><u>A</u><u>V</u><u>S</u><u>E</u><u>G</u><u>S</u><u>M</u><u>Q</u><u>V</u><u>D</u><u>A</u><u>S</u><u>K</u><u>V</u><u>H</u><u>P</u><u>G</u><u>V</u><u>I</u><u>S</u><u>G</u><u>L</u><u>N</u><u>S</u><u>P</u><u>A</u><u>C</u><u>M</u><u>L</u><u>S</u><br/> <u>APLEKQLFY</u><u>I</u><u>G</u><u>T</u><u>M</u><u>L</u><u>P</u><u>N</u><u>T</u><u>R</u><u>P</u><u>H</u><u>S</u><u>V</u><u>V</u><u>F</u><u>Y</u><u>Q</u><u>L</u><u>R</u><u>A</u><u>H</u><u>L</u><u>S</u><u>V</u><u>A</u><u>L</u><u>S</u><u>I</u><u>N</u><u>G</u><u>D</u><u>K</u><u>F</u><u>Q</u><u>Y</u><u>T</u><u>G</u><u>A</u><u>M</u><u>T</u><u>S</u><u>K</u><u>F</u><br/> <u>LMGTYKRVTEK</u><u>G</u><u>D</u><u>E</u><u>H</u><u>V</u><u>L</u><u>S</u><u>L</u><u>V</u><u>F</u><u>G</u><u>K</u><u>T</u><u>K</u><u>D</u><u>L</u><u>P</u><u>D</u><u>L</u><u>R</u><u>G</u><u>P</u><u>F</u><u>S</u><u>P</u><u>S</u><u>L</u><u>T</u><u>S</u><u>A</u><u>Q</u><u>S</u><u>G</u><u>D</u><u>Y</u><u>S</u><u>L</u><u>V</u><u>I</u><u>V</u><u>T</u><br/> <u>FVHYANFHNYFVPNLKDMFSRAVTMTAASYARYVLQKLV</u><u>L</u><u>E</u><u>M</u><u>K</u><u>G</u><u>G</u><u>C</u><u>R</u><u>E</u><u>P</u><u>E</u><u>L</u><br/> <u>DTETLT</u><u>M</u><u>F</u><u>E</u><u>V</u><u>S</u><u>V</u><u>A</u><u>F</u><u>F</u><u>K</u><u>V</u><u>G</u><u>H</u><u>A</u><u>V</u><u>G</u><u>E</u><u>T</u><u>G</u><u>N</u><u>G</u><u>C</u><u>V</u><u>D</u><u>L</u><u>R</u><u>W</u><u>L</u><u>A</u><u>K</u><u>S</u><u>F</u><u>F</u><u>E</u><u>L</u><u>T</u><u>V</u><u>L</u><u>K</u><u>D</u><u>I</u><u>I</u><u>G</u><u>I</u><u>C</u><u>Y</u><br/> <u>ATVKGMQSYGLERLAAML</u><u>M</u><u>A</u><u>T</u><u>V</u><u>K</u><u>M</u><u>E</u><u>E</u><u>L</u><u>G</u><u>H</u><u>L</u><u>T</u><u>T</u><u>E</u><u>K</u><u>Q</u><u>E</u><u>Y</u><u>A</u><u>L</u><u>R</u><u>L</u><u>A</u><u>T</u><u>V</u><u>G</u><u>Y</u><u>P</u><u>K</u><u>A</u><u>G</u><u>V</u><u>Y</u><br/> <u>YSGLIGGATS</u><u>V</u><u>L</u><u>L</u><u>S</u><u>A</u><u>Y</u><u>N</u><u>R</u><u>H</u><u>P</u><u>L</u><u>F</u><u>Q</u><u>P</u><u>L</u><u>H</u><u>T</u><u>V</u><u>M</u><u>R</u><u>E</u><u>T</u><u>L</u><u>F</u><u>I</u><u>G</u><u>S</u><u>H</u><u>V</u><u>V</u><u>L</u><u>R</u><u>E</u><u>L</u><u>R</u><u>L</u><u>N</u><u>V</u><u>T</u><u>T</u><u>Q</u><u>G</u><u>N</u><br/> <u>LALYQLL</u><u>S</u><u>T</u><u>A</u><u>L</u><u>C</u><u>S</u><u>A</u><u>L</u><u>E</u><u>I</u><u>G</u><u>E</u><u>V</u><u>L</u><u>R</u><u>G</u><u>L</u><u>A</u><u>L</u><u>G</u><u>T</u><u>E</u><u>S</u><u>G</u><u>L</u><u>F</u><u>S</u><u>P</u><u>C</u><u>Y</u><u>L</u><u>S</u><u>L</u><u>R</u><u>F</u><u>D</u><u>L</u><u>T</u><u>R</u><u>D</u><u>K</u><u>L</u><u>L</u><u>S</u><u>M</u><u>A</u><u>P</u><u>Q</u><br/> <u>EATLDQA</u><u>A</u><u>A</u><u>V</u><u>S</u><u>N</u><u>A</u><u>V</u><u>D</u><u>G</u><u>F</u><u>L</u><u>G</u><u>R</u><u>L</u><u>S</u><u>L</u><u>E</u><u>R</u><u>E</u><u>D</u><u>R</u><u>D</u><u>A</u><u>W</u><u>H</u><u>L</u><u>P</u><u>A</u><u>Y</u><u>K</u><u>C</u><u>V</u><u>D</u><u>R</u><u>L</u><u>D</u><u>K</u><u>V</u><u>L</u><u>M</u><u>I</u><u>P</u><u>L</u><u>I</u><u>N</u><u>V</u><br/> <u>FIISSDREVRG</u><u>S</u><u>A</u><u>L</u><u>Y</u><u>E</u><u>A</u><u>S</u><u>T</u><u>T</u><u>Y</u><u>L</u><u>S</u><u>S</u><u>S</u><u>L</u><u>F</u><u>L</u><u>S</u><u>P</u><u>V</u><u>I</u><u>M</u><u>N</u><u>K</u><u>C</u><u>S</u><u>Q</u><u>G</u><u>A</u><u>V</u><u>A</u><u>G</u><u>E</u><u>P</u><u>R</u><u>Q</u><u>I</u><u>P</u><u>K</u><u>I</u><u>Q</u><u>N</u><u>F</u><u>T</u><u>R</u><br/> <u>QKSCIFCG</u><u>F</u><u>A</u><u>L</u><u>L</u><u>S</u><u>Y</u><u>D</u><u>E</u><u>K</u><u>E</u><u>G</u><u>L</u><u>E</u><u>T</u><u>T</u><u>Y</u><u>I</u><u>T</u><u>S</u><u>Q</u><u>E</u><u>V</u><u>Q</u><u>N</u><u>S</u><u>I</u><u>L</u><u>S</u><u>S</u><u>N</u><u>Y</u><u>F</u><u>D</u><u>F</u><u>N</u><u>L</u><u>H</u><u>V</u><u>H</u><u>Y</u><u>L</u><u>L</u><u>L</u><u>T</u><u>N</u><br/> <u>GTVMEIAGL</u><u>Y</u><u>E</u><u>E</u><u>R</u><u>A</u><u>S</u><u>G</u><u>G</u><u>S</u><u>G</u><u>S</u><u>A</u><u>S</u><u>G</u><u>A</u><u>S</u><u>G</u><u>S</u><u>G</u><u>S</u><u>G</u><u>S</u><u>G</u><u>S</u><u>S</u><u>S</u><u>A</u><u>S</u><u>G</u><u>L</u><u>A</u><u>Y</u><u>F</u><u>L</u><u>P</u><u>P</u><u>R</u><u>V</u><u>R</u><u>G</u><br/> <u>GRVAAAAITWVPKPNVEVWPVDP</u><u>P</u><u>P</u><u>P</u><u>P</u><u>V</u><u>N</u><u>F</u><u>N</u><u>K</u><u>T</u><u>A</u><u>E</u><u>Q</u><u>E</u><u>Y</u><u>G</u><u>D</u><u>K</u><u>E</u><u>V</u><u>K</u><u>L</u><u>P</u><u>H</u><u>W</u><u>T</u><u>P</u><u>L</u><u>H</u><u>T</u><u>F</u><u>O</u><u>V</u><u>P</u><u>O</u><u>N</u><br/> <u>YTKANCTYCNTREYTF</u><u>S</u><u>Y</u><u>K</u><u>G</u><u>C</u><u>C</u><u>F</u><u>Y</u><u>F</u><u>T</u><u>K</u><u>K</u><u>H</u><u>T</u><u>W</u><u>N</u><u>G</u><u>C</u><u>F</u><u>O</u><u>A</u><u>C</u><u>A</u><u>E</u><u>L</u><u>Y</u><u>P</u><u>C</u><u>T</u><u>Y</u><u>F</u><u>Y</u><u>G</u><u>P</u><u>T</u><u>P</u><u>D</u><u>I</u><u>L</u><u>P</u><u>V</u><u>V</u><u>T</u><u>R</u></i></p> |

|                                    |                                                                                                                                                                                                                                                                                                                                                                                                                                                                                                                                                                                                                                                                                                                                                                                                                                                                                                                                                                                                                                                                                                                                                                                                                                                                                                               |
|------------------------------------|---------------------------------------------------------------------------------------------------------------------------------------------------------------------------------------------------------------------------------------------------------------------------------------------------------------------------------------------------------------------------------------------------------------------------------------------------------------------------------------------------------------------------------------------------------------------------------------------------------------------------------------------------------------------------------------------------------------------------------------------------------------------------------------------------------------------------------------------------------------------------------------------------------------------------------------------------------------------------------------------------------------------------------------------------------------------------------------------------------------------------------------------------------------------------------------------------------------------------------------------------------------------------------------------------------------|
|                                    | <u>NLNAIESLWVGYYRVGEGNWTSLDGGTFKVVYOIFGSHCTYVSKFSTVPVSHHECSFLKPCLCVSORSNSGSHHHHHH</u>                                                                                                                                                                                                                                                                                                                                                                                                                                                                                                                                                                                                                                                                                                                                                                                                                                                                                                                                                                                                                                                                                                                                                                                                                         |
| gp350D <sub>123</sub> nanoparticle | <u>MDSKGSQKGSRLLLLLLVSNLLLPOGVLAEAALLVCQYTIQSLIHLTGEDPGFFNV EIPFPFYPTCNVCTADVNTINFDVGGKKHQLDLDFGQLPHTKAVYQPRGAFGGSENATNLFLELLGAGELALTMRSKKLPINVTTGEEQQVSLESVDVYFQDVFMTWC HHAEMQNPVYLIPETVPYIKWDNCNSTNITAVVRAQGLDVTLPPLSPTS AQDSNFSV KTEMLGNEIDIECIMEDGEISQVLPDGNKFNITCSGYESHVPSGGILTSTSPVATPIPG TGYAYSLRLTPRPVSRFLGNNSILYVFYSGNGPKASGGDYCIQSNIVFSDEIPASQDMP TTTDITYVGD NATYSVPMVTSEDANSPNVTVAFWAWPNN TETDFKCKWTLTSGT PSGCENISGAFASNRTFDITVSGLTAPKTLIITRATNATTTTHKVFISKAPEGSESQV RQQFSKDIEKLLNEOVNKEMQSSNLYMSMSSWSYTHSLDGAGLFLFDHAAEEYEHA KKLIIFLNENNVPVQLTSISAPEHKFEGLTOIFOKAYEHEQHISESINNIVDHAICKCKDH ATFNFLQWYVAEQHEEEVLFKDILDKIELIGNENHGLYLADQYVKGIKSRKS</u>                                                                                                                                                                                                                                                                                                                                                                                                                                                                                                                                                                                                                                               |
| gH/gL nanoparticle                 | <u>MRAVGVFLAICLVTFVLPWTWGNWAYPCCHVTQLRAQHLLALENISDIYLVSNQTCDFGLASLNSPKNGSNQLVISRCANGLNVVFFISILKRSSALTGHLRELLTTLETLYGFSFVEDLFGANLNRYAWHRGGGGSGSASSGASASGSSNGSGSGSGSNSSASSGASSGGASGGSGG SGAASLSEVKLHLHDIEGHASHYTIPWTELMKVPGLSPEALWREANVTEDLASM LNRYKLIYKTSGLTGIALAEPVDIPAVSEGSMQVDASKVHPGVISGLNSPACMLS APLEKQLFYIYIGTMLPNTRPHSYVYQVLAHLSYVALSINGDKFYTGAMTSKF LMGTYKRVTEKGDEHVLVSLVFGKTKDLPDLRGPFSYPSLTS AQSGDYSLVIVTT FVHYANFHNYFVFNKDMFSRAVTMTAASYARYVLQKLVLEMKGGCREPEL DTETLTTMFEVSVAFFKVGHAVGETGNGCVDLRWLAKSFFELTVLKDIIIGICYG ATVKGMQSYGLERLAAMLMA TVKMEELGHLTTEKQEYALRLATVGYPKAGV YSGLIGGATSVLLSAYNRHPLFQPLHTVMRETLFIGSHVVLRELRLNVTTQGNP LALYQLLSTALCSALEIGEVLRLGALGTESGLFSPCYLSLRFDLTRDKLLSMAPQ EATLDQAAVSNVAVDGFGLRSLEREDRDAWHLPAYKCVDRDLKVLMIPLINVT FISSDREVRGSALYEASTTYLSSSLFLSPVIMNKCSQAVAGEPRQIPKIQNFRTR QKSCIFCGFALLSYDEKEGLETTTYITSQEVQNSILSSNYDFDNLHVHYLLTTN GTVMEIAGLYEERASGGGSGSASSGASASGSSGSGSGSGSSSASSGASSGGASGGGS GGSGESQVROQFSKDIEKLLNEOVNKEMQSSNLYMSMSSWSYTHSLDGAGLFLFDH AAEYEHA KKLIIFLNENNVPVQLTSISAPEHKFEGLTOIFOKAYEHEQHISESINNIVD HAIKCKDHATFNFLQWYVAEQHEEEVLFKDILDKIELIGNENHGLYLADQYVKGIK SRKS</u>                                                                                                                                                                                     |
| gH/gL/gp42 nanoparticle            | <u>MRAVGVFLAICLVTFVLPWTWGNWAYPCCHVTQLRAQHLLALENISDIYLVSNQTCDFGLASLNSPKNGSNQLVISRCANGLNVVFFISILKRSSALTGHLRELLTTLETLYGFSFVEDLFGANLNRYAWHRGGGGSGSASSGASASGSSNGSGSGSGSNSSASSGASSGGASGGSGG SGAASLSEVKLHLHDIEGHASHYTIPWTELMKVPGLSPEALWREANVTEDLASM LNRYKLIYKTSGLTGIALAEPVDIPAVSEGSMQVDASKVHPGVISGLNSPACMLS APLEKQLFYIYIGTMLPNTRPHSYVYQVLAHLSYVALSINGDKFYTGAMTSKF LMGTYKRVTEKGDEHVLVSLVFGKTKDLPDLRGPFSYPSLTS AQSGDYSLVIVTT FVHYANFHNYFVFNKDMFSRAVTMTAASYARYVLQKLVLEMKGGCREPEL DTETLTTMFEVSVAFFKVGHAVGETGNGCVDLRWLAKSFFELTVLKDIIIGICYG ATVKGMQSYGLERLAAMLMA TVKMEELGHLTTEKQEYALRLATVGYPKAGV YSGLIGGATSVLLSAYNRHPLFQPLHTVMRETLFIGSHVVLRELRLNVTTQGNP LALYQLLSTALCSALEIGEVLRLGALGTESGLFSPCYLSLRFDLTRDKLLSMAPQ EATLDQAAVSNVAVDGFGLRSLEREDRDAWHLPAYKCVDRDLKVLMIPLINVT FISSDREVRGSALYEASTTYLSSSLFLSPVIMNKCSQAVAGEPRQIPKIQNFRTR QKSCIFCGFALLSYDEKEGLETTTYITSQEVQNSILSSNYDFDNLHVHYLLTTN GTVMEIAGLYEERASGGGSGSASSGASASGSSGSGSGSGSSSASSGLAYFLPPRVGG GRVAAAAITWVPKPNVEVWPVDP PPPVNFNKTAEQEYGDKEVKLPHWPTLHTFOVPON YTKANCTYCNTREYTF SYKGCCFYFTKKKHTWNGCFQACAELYPCTYFYGPTDILPVVTR NLNAIESLWVGYYRVGEGNWTSLDGGTFKVVYOIFGSHCTYVSKFSTVPVSHHECSFLKPCLCVSORSNSGGSGSASSGASASGSSGSGSGSGSSSASSGASSGGASGGSGSGGGSGSA SSGASASGSSGSGSGSGSSSASSGASSGGASGGSGSGSGESQVROQFSKDIEKLLNEOV NKEMQSSNLYMSMSSWSYTHSLDGAGLFLFDHAAEEYEHA KKLIIFLNENNVPVQL</u> |

|                                                                                                                               |
|-------------------------------------------------------------------------------------------------------------------------------|
| TSISAP <del>EHKFEGLTOIFQKAYEHEQHISESINNIVDHA</del> IKCKDHATFNLOWYVAEQHE<br>EEVLFKDILDKIELIGNENHGLYLADQYVKGI <del>AKSRKS</del> |
|-------------------------------------------------------------------------------------------------------------------------------|

488

489

490  
491  
492

## SUPPLEMENTAL FIGURES

493

494 **Supplemental Figure 1. Expression of single chain gH/gL and single chain gH/gL/gp42**  
495 **constructs.**

496 (A.) SDS-PAGE analysis of purified single chain gH/gL and single chain gH/gL/gp42  
497 constructs.

498 (B.) SDS-PAGE of purified single chain gH/gL-NP and single chain gH/gL/gp42-NP.

499 **Supplemental Figure 2. Immunogenicity of single chain gH/gL-NP with or without AF03**  
500 **adjuvant.**

501 Mice were immunized at week 0 and week 3. Immune sera were collected at weeks 0, 2  
502 and 5 and antibody titers were determined by ELISA. Mean and standard error are shown. The p  
503 value from week 5 was <0.0001.

504

505 **Supplemental Figure 3. Immunogenicity of single chain gH/gL-NP and gp350D<sub>123</sub>-NP in**  
506 **mice.**

507 A monovalent single chain gH/gL-NP or gp350D<sub>123</sub>-NP, or bivalent single chain gH/gL-  
508 NP+gp350D<sub>123</sub>-NP was used to immunize mice with AF03 as adjuvant. Antibody titers pre- and  
509 post-immunization against either (a) gH/gL heterodimer or (b) gp350D<sub>123</sub> were determined by  
510 ELISA. The data are shown as box-and-whiskers plots (box indicates lower and upper quartiles  
511 with line at median, and whiskers span minimum and maximum data points; \*p<0.0001 compared  
512 to pre-immune sera).

513

514 **Supplemental Figure 4. Immunogenicity of single chain gH/gL/gp42-NP with gp350D<sub>123</sub>-NP**  
515 **in mice.**

516 Monovalent single chain gH/gLgp42-NP (a) or bivalent single chain gH/gL-NP/gp42-  
517 NP+gp350D<sub>123</sub>-NP (b) was used to immunize mice with AF03 as adjuvant. Antibody titers from  
518 immune sera collected 2 weeks after first and second immunizations against either gH/gL  
519 heterodimer, gp42 or gp350D<sub>123</sub> were determined by ELISA. The data are shown as box-and-  
520 whiskers plots (box indicates lower and upper quartiles with line at median, and whiskers span  
521 minimum and maximum data points; \*p<0.0001 compared to week 2 sera).

522

523 **Supplemental Figure 5. Immunogenicity of single chain gH/gL-NP+gp350D<sub>123</sub>-NP and single**  
524 **chain gH/gL/gp42-NP+gp350D<sub>123</sub>-NP vaccines in ferrets.**

525 Ferrets (n=6/group) were immunized with either (a) bivalent gH/gL-NP+gp350D<sub>123</sub>-NP or  
526 (b) bivalent gH/gL/gp42-NP+gp350D<sub>123</sub>-NP vaccines at weeks 0 and 4. Binding antibody titers  
527 to gH/gL, gp350D<sub>123</sub>, and gp42 were determined. Means and standard deviations are shown  
528 (\*\*p<0.0001 or \*p<0.05 respectively compared to pre-immune sera).

529

530 **Supplemental Figure 6. Immunogenicity of single chain gH/gL-NP+gp350D<sub>123</sub>-NP and**  
531 **single chain gH/gL/gp42-NP+gp350D<sub>123</sub>-NP vaccines in nonhuman primates.**

532 Rhesus macaques were immunized with either (a) single chain gH/gL-NP+gp350D<sub>123</sub>-NP  
533 or (b) single chain gH/gL/gp42-NP+gp350D<sub>123</sub>-NP bivalent vaccines at weeks 0, 4, and 10. Pre-  
534 and post-immunization binding antibody titers against gH/gL or gH/gL/gp42 or gp350D<sub>123</sub> were  
535 determined by ELISA. Means and standard deviations are shown (\*\*p<0.0001 or \*p<0.01  
536 respectively compared to pre-immune sera).

537 **Supplemental Figure 7. EBV lymphoma in challenged humanized mice.** EBV-positive B cell  
538 lymphomas and CD20 and EBER positive cells were observed in the (a) spleen and (b) kidney of  
539 mice receiving IgG from naïve BALB/C after EBV challenge (Control). No evidence of EBV-  
540 positive B cell lymphomas was seen in mice receiving IgG from animals vaccinated with single  
541 chain gH/gL-NP+gp350D<sub>123</sub>-NP or gH/gL/gp42-NP+gp350D<sub>123</sub>-NP (Immune). CD20 staining  
542 and EBER are also negative in these mice. Tissues were harvested and stained as in Fig. 5. Arrows  
543 indicate representative areas of pathology and staining for the indicated cellular or viral proteins.

544

545 **Supplemental Figure 8. Anti-gH, gL, and gp42 antibody levels in mice challenged with**  
546 **EBV.** Antibody titers in plasma samples of humanized mice receiving IgG from vaccinated or  
547 naïve (control) mice obtained one week after challenge were measured by LIPS assay and shown  
548 as RLUs. Antibody titers in animals that received IgG from naïve, single chain gH/gL-  
549 NP+gp350D<sub>123</sub>-NP, and gH/gL/gp42-NP+gp350D<sub>123</sub>-NP immunized BALB/c mice are shown.  
550 Each symbol indicates one mouse. Minimum and maximum data points are represented by  
551 whiskers and box represents upper and lower quartiles with the horizontal line at the median.

552

553

554

555           **REFERENCES**

- 556    1.    J. I. Cohen, E. S. Mocarski, N. Raab-Traub, L. Corey, G. J. Nabel, The need and  
557           challenges for development of an Epstein-Barr virus vaccine. *Vaccine* **31 Suppl 2**, B194-  
558           196 (2013).
- 559    2.    J. I. Cohen, A. S. Fauci, H. Varmus, G. J. Nabel, Epstein-Barr virus: an important vaccine  
560           target for cancer prevention. *Sci Transl Med* **3**, 107fs107 (2011).
- 561    3.    D. Dierickx, T. M. Habermann, Post-Transplantation Lymphoproliferative Disorders in  
562           Adults. *N Engl J Med* **378**, 549-562 (2018).
- 563    4.    J. I. Cohen, Epstein-barr virus vaccines. *Clin Transl Immunology* **4**, e32 (2015).
- 564    5.    J. D. Fingerroth *et al.*, Epstein-Barr virus receptor of human B lymphocytes is the C3d  
565           receptor CR2. *Proc Natl Acad Sci U S A* **81**, 4510-4514 (1984).
- 566    6.    M. K. Spriggs *et al.*, The extracellular domain of the Epstein-Barr virus BZLF2 protein  
567           binds the HLA-DR beta chain and inhibits antigen presentation. *J Virol* **70**, 5557-5563  
568           (1996).
- 569    7.    J. I. Cohen, Vaccine Development for Epstein-Barr Virus. *Adv Exp Med Biol* **1045**, 477-  
570           493 (2018).
- 571    8.    J. Chen *et al.*, Ephrin receptor A2 is a functional entry receptor for Epstein-Barr virus.  
572           *Nat Microbiol* **3**, 172-180 (2018).
- 573    9.    H. Zhang *et al.*, Ephrin receptor A2 is an epithelial cell receptor for Epstein-Barr virus  
574           entry. *Nat Microbiol* **3**, 1-8 (2018).
- 575    10.   E. M. Sokal *et al.*, Recombinant gp350 vaccine for infectious mononucleosis: a phase 2,  
576           randomized, double-blind, placebo-controlled trial to evaluate the safety,  
577           immunogenicity, and efficacy of an Epstein-Barr virus vaccine in healthy young adults. *J*  
578           *Infect Dis* **196**, 1749-1753 (2007).
- 579    11.   M. A. Epstein, A. J. Morgan, S. Finerty, B. J. Randle, J. K. Kirkwood, Protection of  
580           cottontop tamarins against Epstein-Barr virus-induced malignant lymphoma by a  
581           prototype subunit vaccine. *Nature* **318**, 287-289 (1985).
- 582    12.   J. Sashihara *et al.*, Soluble rhesus lymphocryptovirus gp350 protects against infection and  
583           reduces viral loads in animals that become infected with virus after challenge. *PLoS*  
584           *Pathog* **7**, e1002308 (2011).
- 585    13.   X. Cui *et al.*, Rabbits immunized with Epstein-Barr virus gH/gL or gB recombinant  
586           proteins elicit higher serum virus neutralizing activity than gp350. *Vaccine* **34**, 4050-  
587           4055 (2016).
- 588    14.   M. Kanekiyo *et al.*, Rational Design of an Epstein-Barr Virus Vaccine Targeting the  
589           Receptor-Binding Site. *Cell* **162**, 1090-1100 (2015).
- 590    15.   W. Bu *et al.*, Immunization with Components of the Viral Fusion Apparatus Elicits  
591           Antibodies That Neutralize Epstein-Barr Virus in B Cells and Epithelial Cells. *Immunity*  
592           **50**, 1305-1316 e1306 (2019).
- 593    16.   T. Vesikari, S. Pepin, I. Kusters, A. Hoffenbach, M. Denis, Assessment of squalene  
594           adjuvanted and non-adjuvanted vaccines against pandemic H1N1 influenza in children 6  
595           months to 17 years of age. *Hum Vaccin Immunother* **8**, 1283-1292 (2012).
- 596    17.   A. Carville, K. G. Mansfield, Comparative pathobiology of macaque  
597           lymphocryptoviruses. *Comp Med* **58**, 57-67 (2008).
- 598    18.   S. Fujiwara, K. Imadome, M. Takei, Modeling EBV infection and pathogenesis in new-  
599           generation humanized mice. *Exp Mol Med* **47**, e135 (2015).

- 600 19. S. Fujiwara, G. Matsuda, K. Imadome, Humanized mouse models of Epstein-Barr virus  
601 infection and associated diseases. *Pathogens* **2**, 153-176 (2013).
- 602 20. M. Islas-Ohlmayer *et al.*, Experimental infection of NOD/SCID mice reconstituted with  
603 human CD34+ cells with Epstein-Barr virus. *J Virol* **78**, 13891-13900 (2004).
- 604 21. M. Yajima *et al.*, A new humanized mouse model of Epstein-Barr virus infection that  
605 reproduces persistent infection, lymphoproliferative disorder, and cell-mediated and  
606 humoral immune responses. *J Infect Dis* **198**, 673-682 (2008).
- 607 22. G. M. Escalante *et al.*, A Pentavalent Epstein-Barr Virus-Like Particle Vaccine Elicits  
608 High Titers of Neutralizing Antibodies against Epstein-Barr Virus Infection in  
609 Immunized Rabbits. *Vaccines (Basel)* **8**, (2020).
- 610 23. C. Cox *et al.*, Immunization of common marmosets with Epstein-Barr virus (EBV)  
611 envelope glycoprotein gp340: effect on viral shedding following EBV challenge. *J Med*  
612 *Virol* **55**, 255-261 (1998).
- 613 24. G. Khan, W. Ahmed, P. S. Philip, M. H. Ali, A. Adem, Healthy rabbits are susceptible to  
614 Epstein-Barr virus infection and infected cells proliferate in immunosuppressed animals.  
615 *Virol J* **12**, 28 (2015).
- 616 25. D. Espinosa *et al.*, Passive Transfer of Immune Sera Induced by a Zika Virus-Like  
617 Particle Vaccine Protects AG129 Mice Against Lethal Zika Virus Challenge.  
618 *EBioMedicine* **27**, 61-70 (2018).
- 619 26. M. K. Howard *et al.*, H5N1 whole-virus vaccine induces neutralizing antibodies in  
620 humans which are protective in a mouse passive transfer model. *PLoS One* **6**, e23791  
621 (2011).
- 622 27. T. F. Rogers *et al.*, Isolation of potent SARS-CoV-2 neutralizing antibodies and  
623 protection from disease in a small animal model. *Science* **369**, 956-963 (2020).
- 624 28. C. Munz, Immune Control and Vaccination against the Epstein-Barr Virus in Humanized  
625 Mice. *Vaccines (Basel)* **7**, (2019).
- 626 29. W. Kabsch, Integration, scaling, space-group assignment and post-refinement. *Acta*  
627 *Crystallogr D Biol Crystallogr* **66**, 133-144 (2010).
- 628 30. W. Kabsch, Xds. *Acta Crystallogr D Biol Crystallogr* **66**, 125-132 (2010).
- 629 31. A. J. McCoy, Solving structures of protein complexes by molecular replacement with  
630 Phaser. *Acta Crystallogr D Biol Crystallogr* **63**, 32-41 (2007).
- 631 32. A. J. McCoy *et al.*, Phaser crystallographic software. *J Appl Crystallogr* **40**, 658-674  
632 (2007).
- 633 33. P. Emsley, B. Lohkamp, W. G. Scott, K. Cowtan, Features and development of Coot.  
634 *Acta Crystallogr D Biol Crystallogr* **66**, 486-501 (2010).
- 635 34. P. D. Adams *et al.*, PHENIX: a comprehensive Python-based system for macromolecular  
636 structure solution. *Acta Crystallogr D Biol Crystallogr* **66**, 213-221 (2010).
- 637 35. A. E. Coghill *et al.*, High Levels of Antibody that Neutralize B-cell Infection of Epstein-  
638 Barr Virus and that Bind EBV gp350 Are Associated with a Lower Risk of  
639 Nasopharyngeal Carcinoma. *Clin Cancer Res* **22**, 3451-3457 (2016).
- 640 36. J. Sashihara, P. D. Burbelo, B. Savoldo, T. C. Pierson, J. I. Cohen, Human antibody titers  
641 to Epstein-Barr Virus (EBV) gp350 correlate with neutralization of infectivity better than  
642 antibody titers to EBV gp42 using a rapid flow cytometry-based EBV neutralization  
643 assay. *Virology* **391**, 249-256 (2009).



- 644 37. M. Gupta, S. Mahanty, M. Bray, R. Ahmed, P. E. Rollin, Passive transfer of antibodies  
645 protects immunocompetent and immunodeficient mice against lethal Ebola virus infection  
646 without complete inhibition of viral replication. *J Virol* **75**, 4649-4654 (2001).
- 647 38. J. Maamary, T. T. Wang, G. S. Tan, P. Palese, J. V. Ravetch, Increasing the breadth and  
648 potency of response to the seasonal influenza virus vaccine by immune complex  
649 immunization. *Proc Natl Acad Sci U S A* **114**, 10172-10177 (2017).
- 650 39. T. Strowig *et al.*, Priming of protective T cell responses against virus-induced tumors in  
651 mice with human immune system components. *J Exp Med* **206**, 1423-1434 (2009).
- 652 40. E. F. Pettersen *et al.*, UCSF Chimera--a visualization system for exploratory research and  
653 analysis. *J Comput Chem* **25**, 1605-1612 (2004).

654

655

656

657

658

659

660

661

662

663

**A**

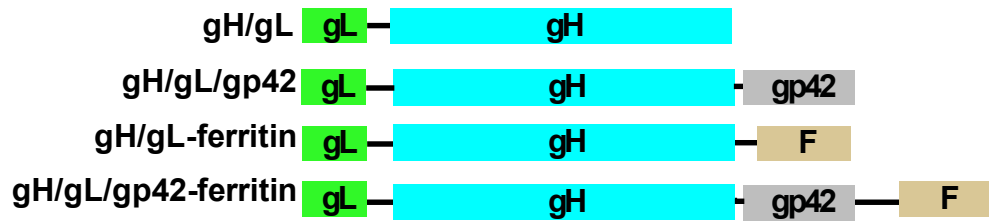

**B**

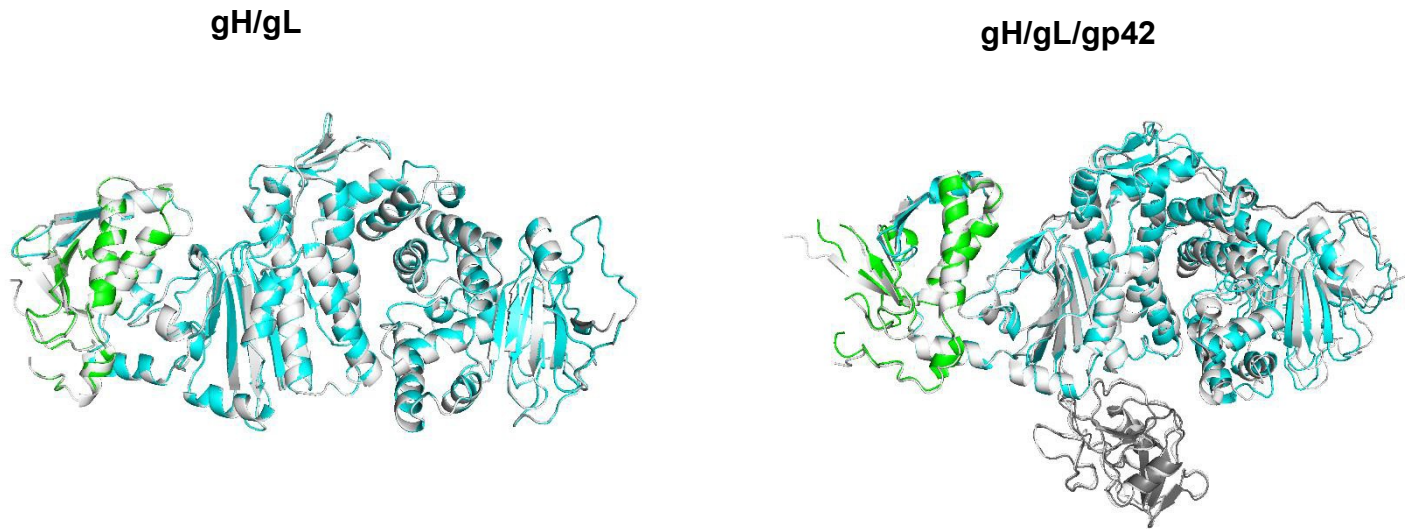

**C**

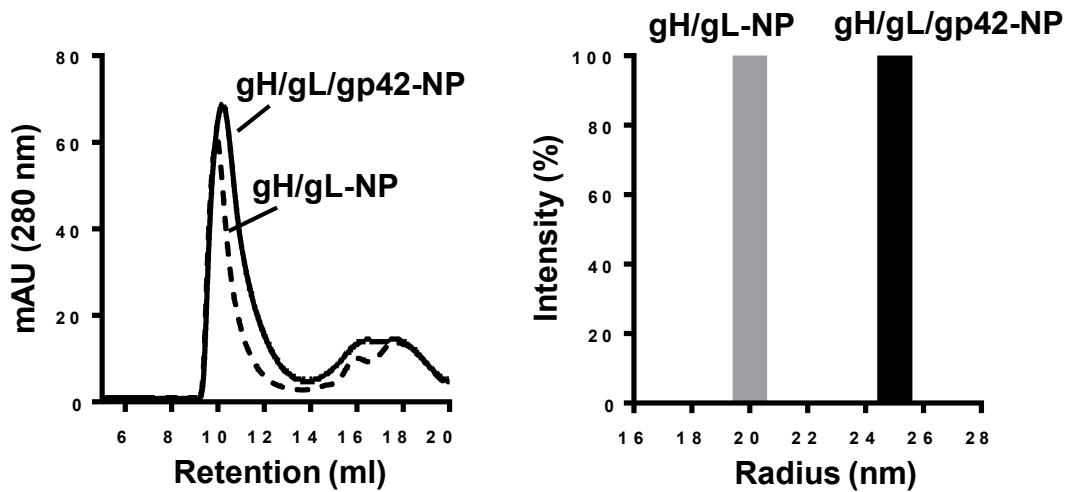

**D**

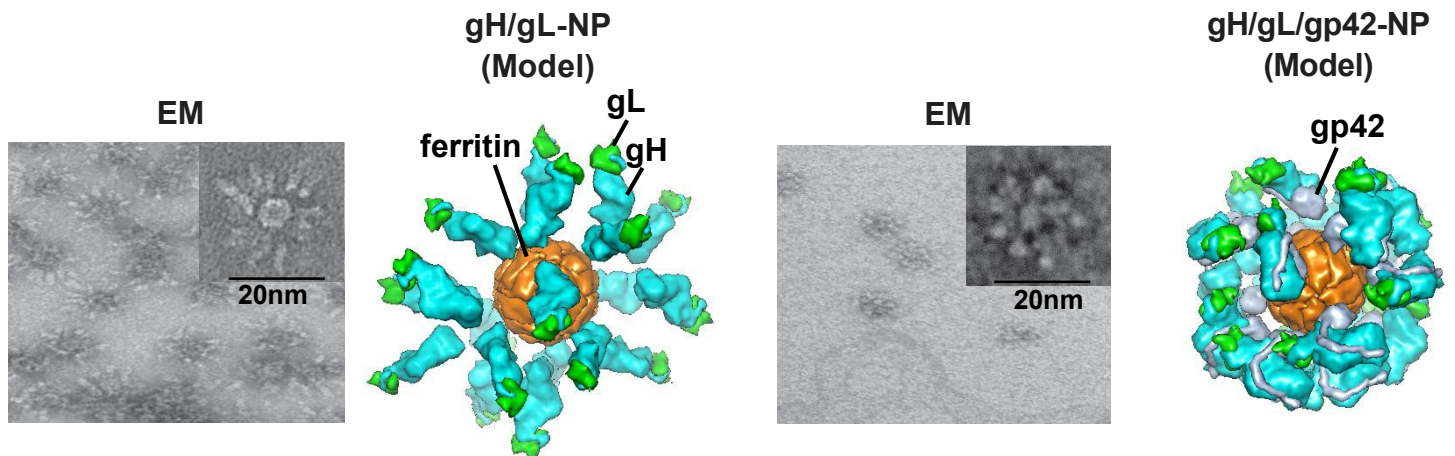

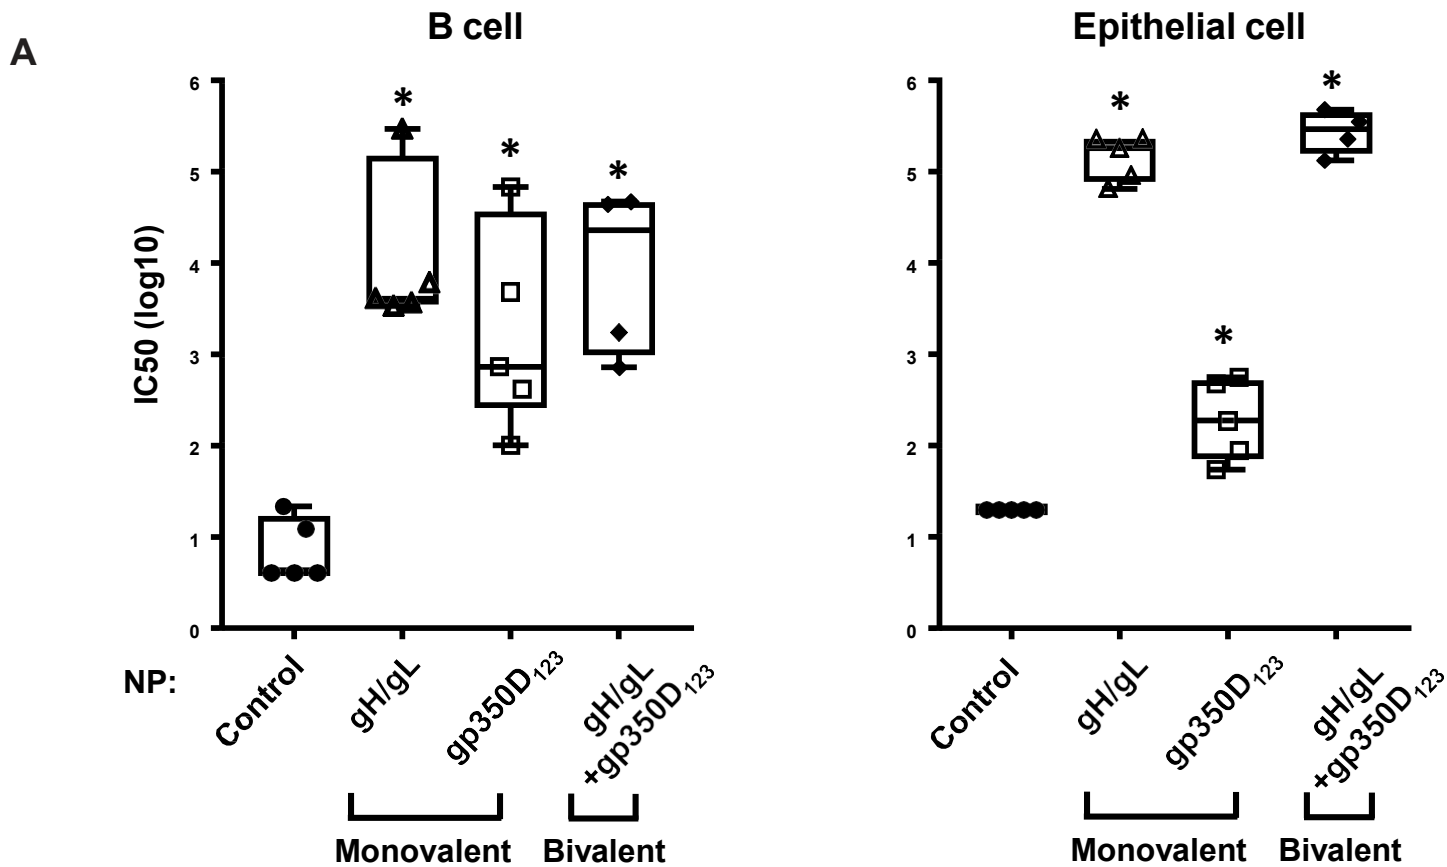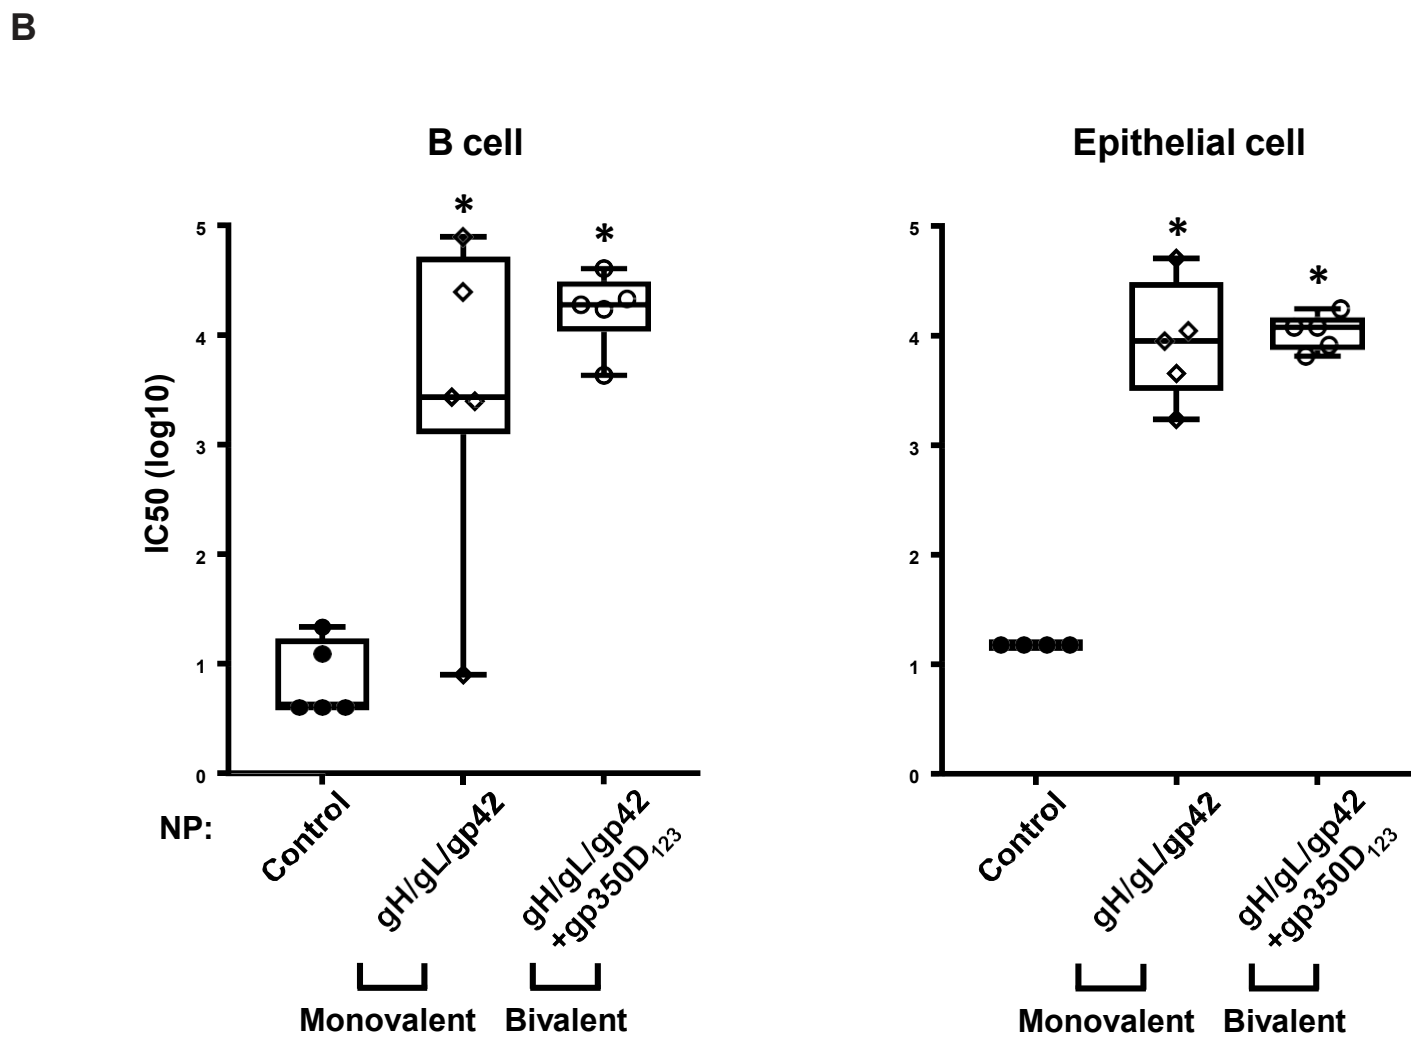

**A** **Ferret (naïve)**

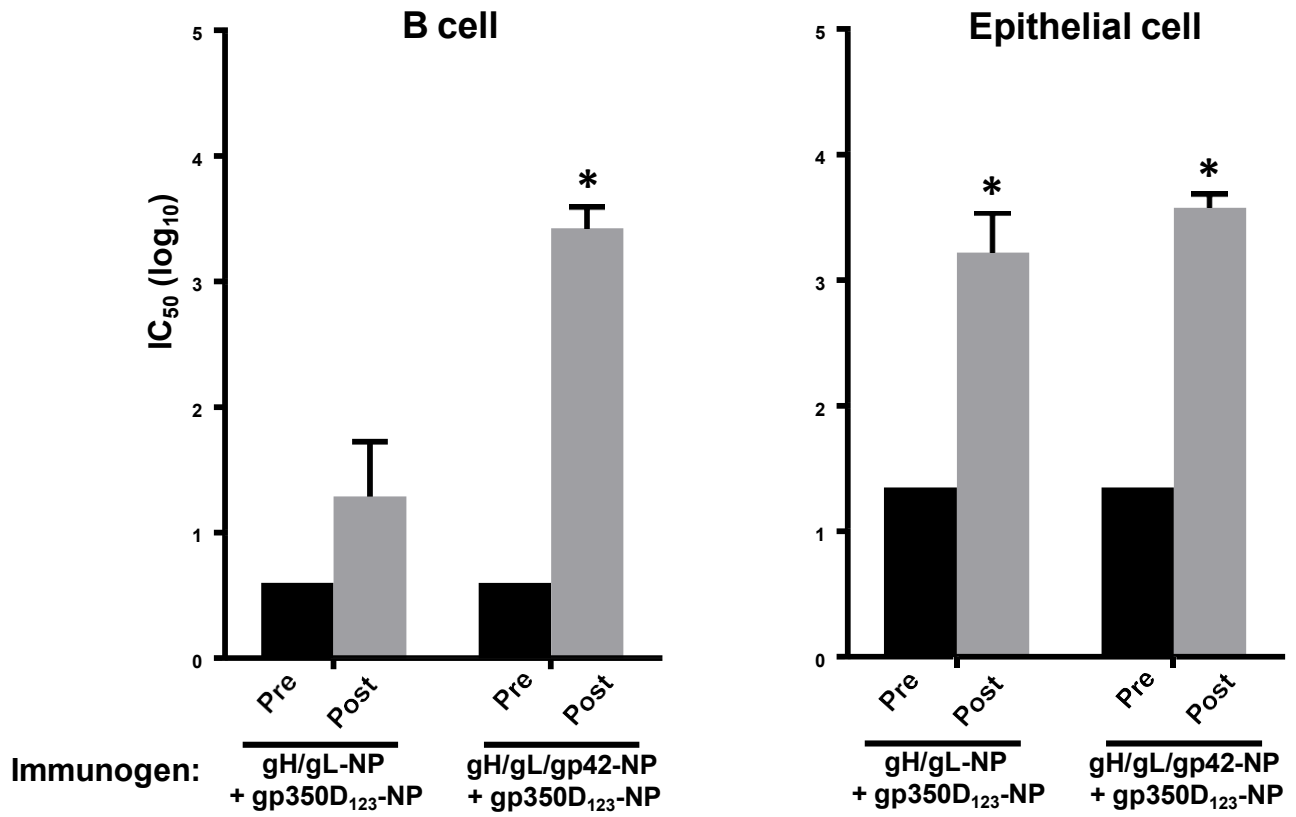

**B** **Non-human Primate (pre-immune)**

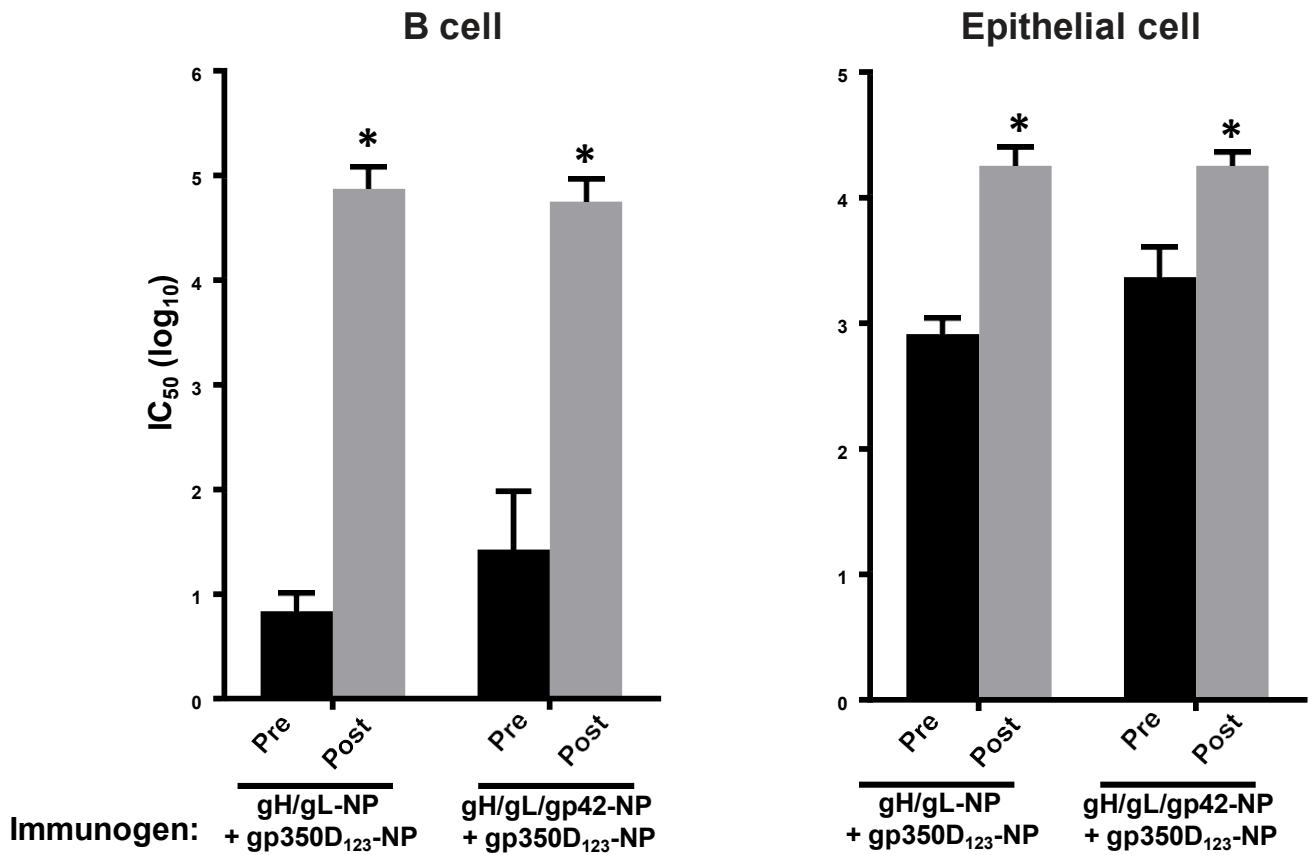

A

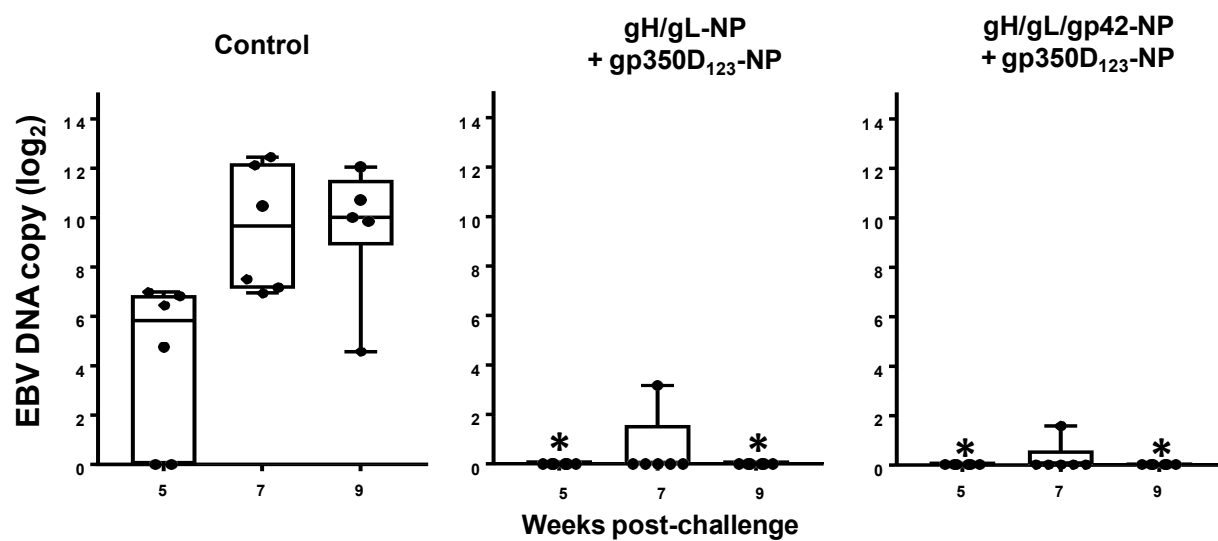

B

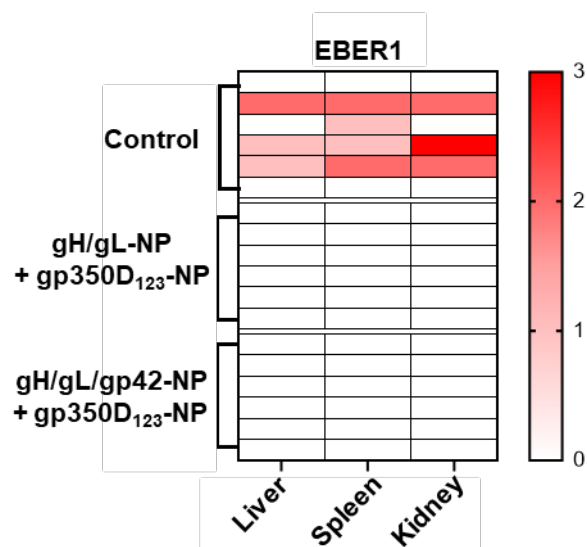

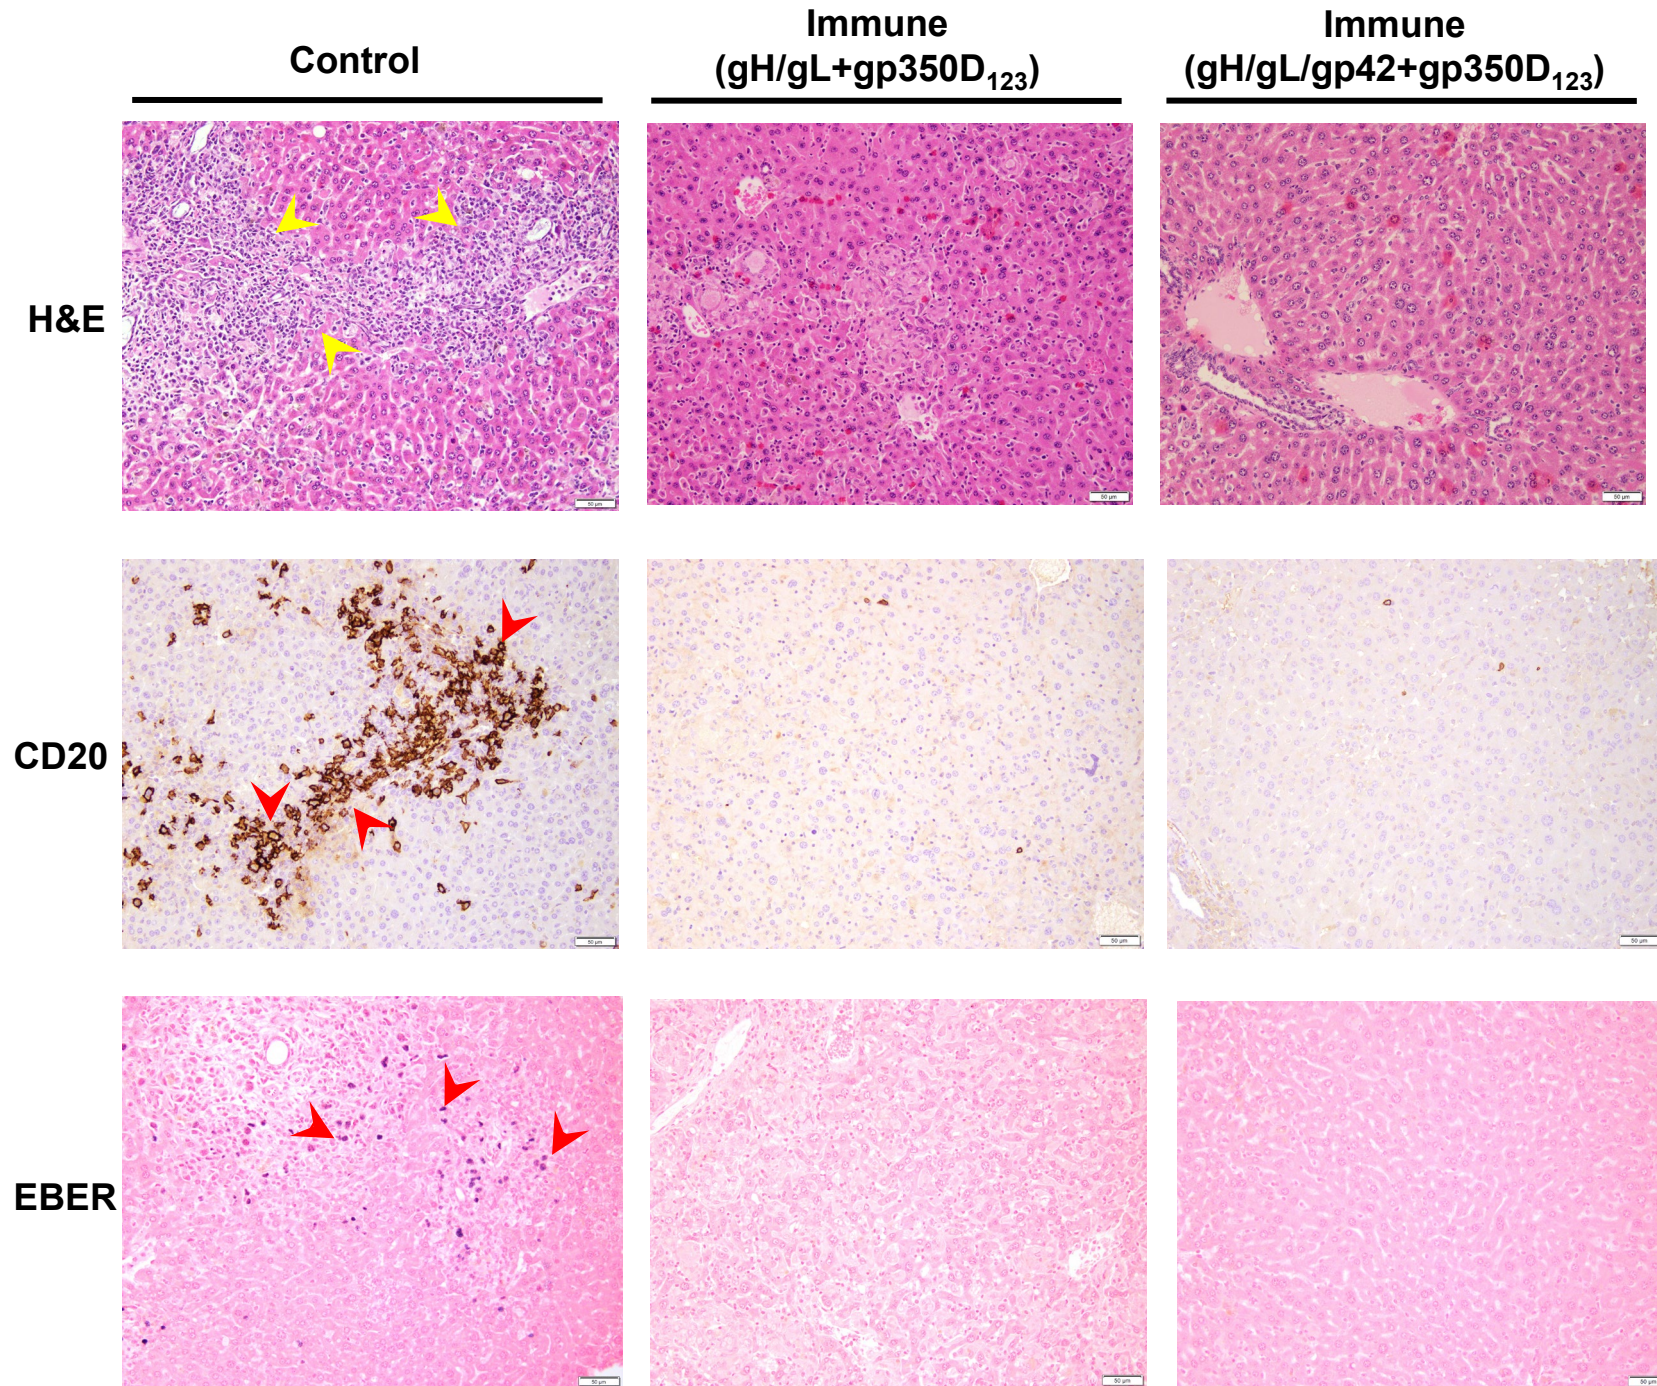

**a**

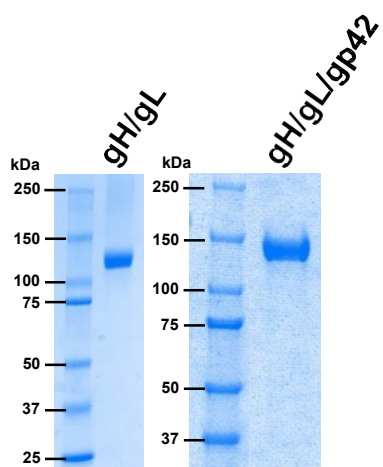

**b**

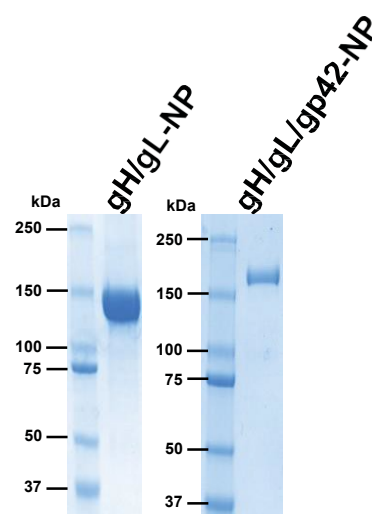

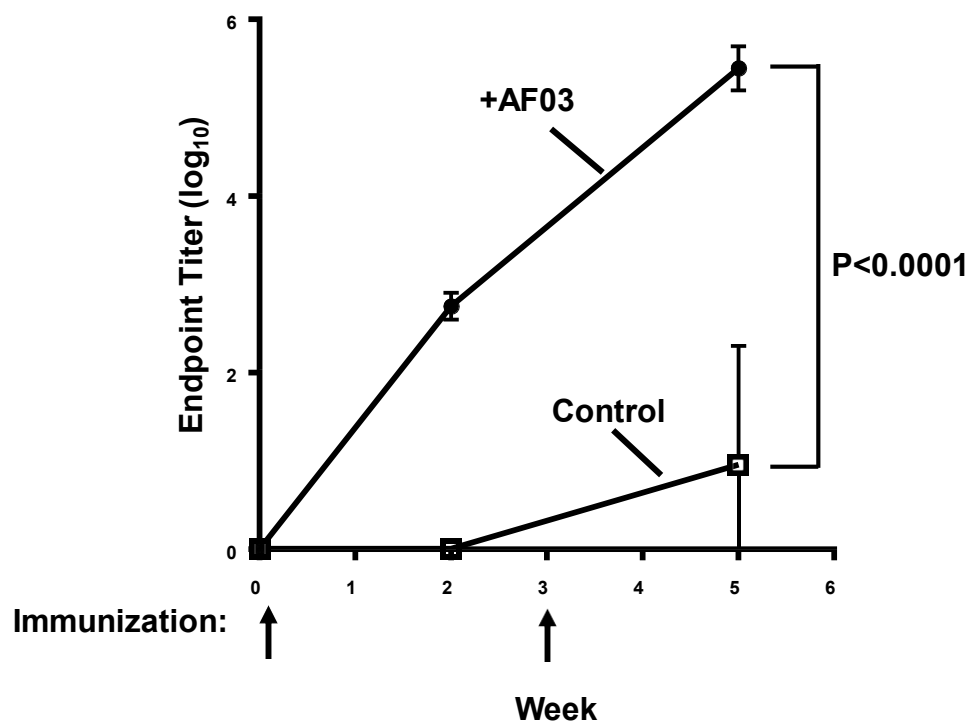



a

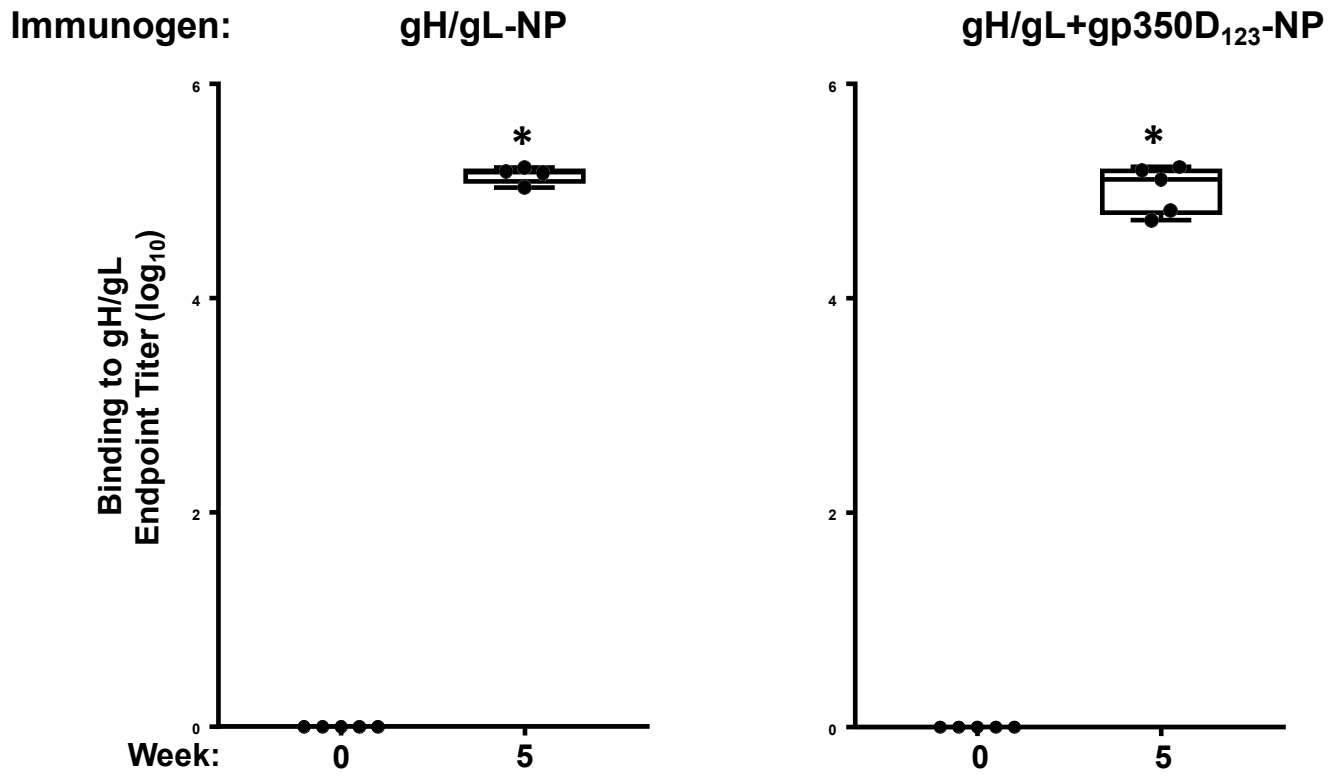

b

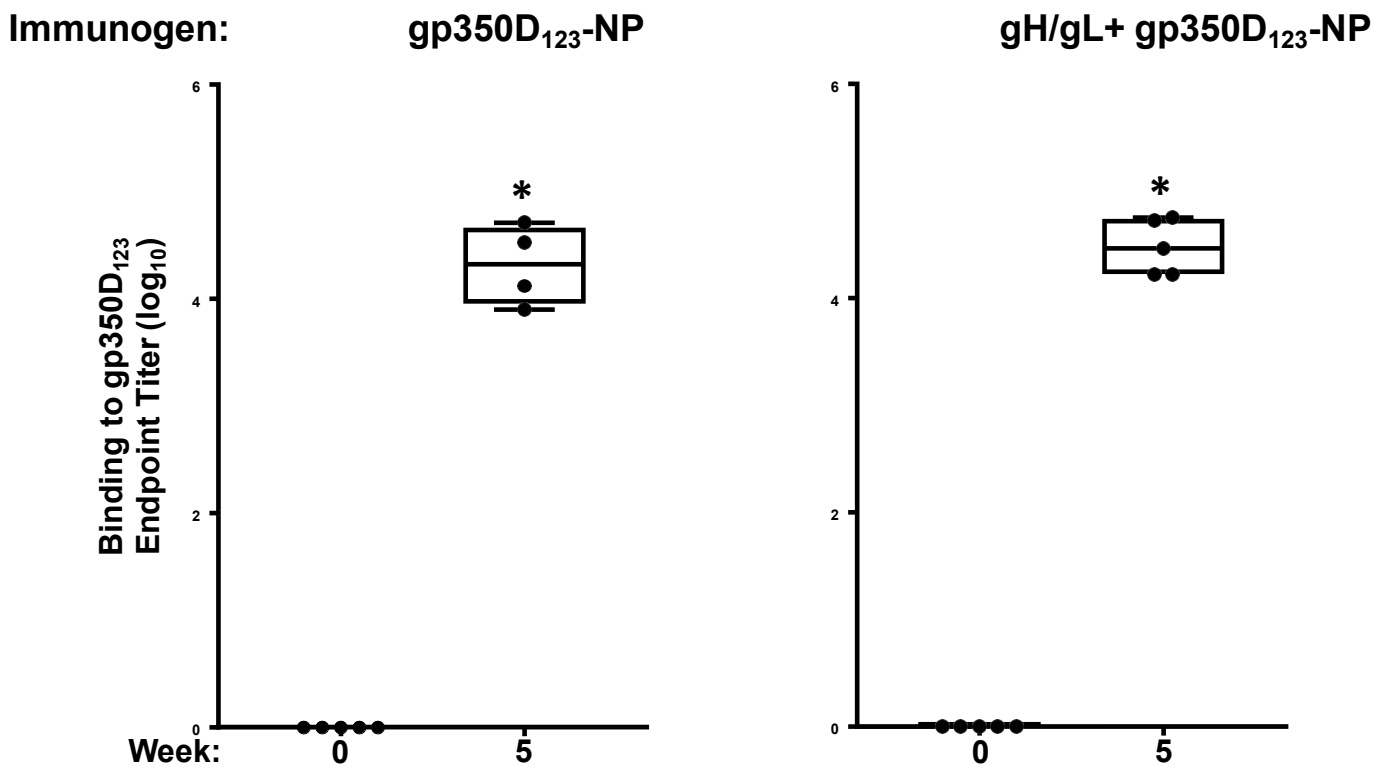

a

Immunogen:

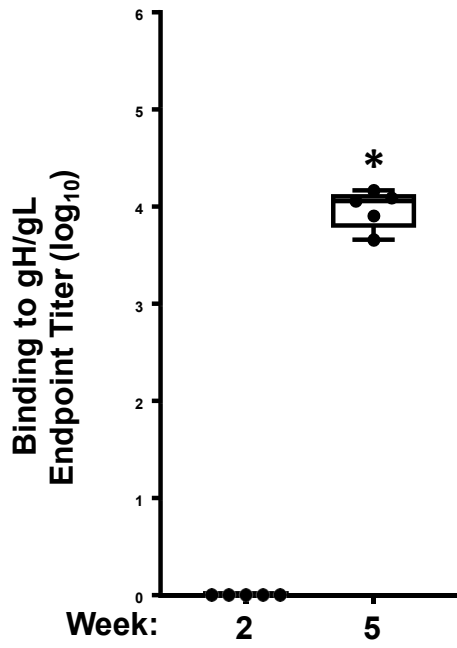

gH/gL/gp42-NP

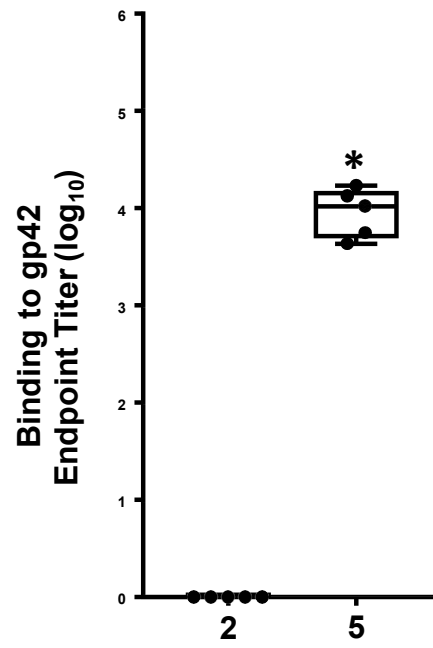

b

Immunogen:

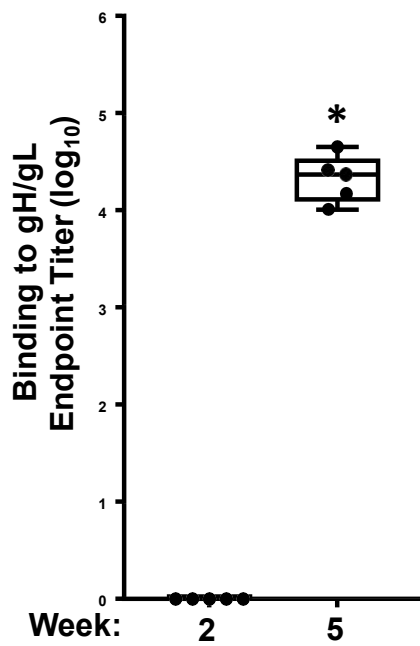

gH/gL/gp42+gp350D<sub>123</sub>-NP

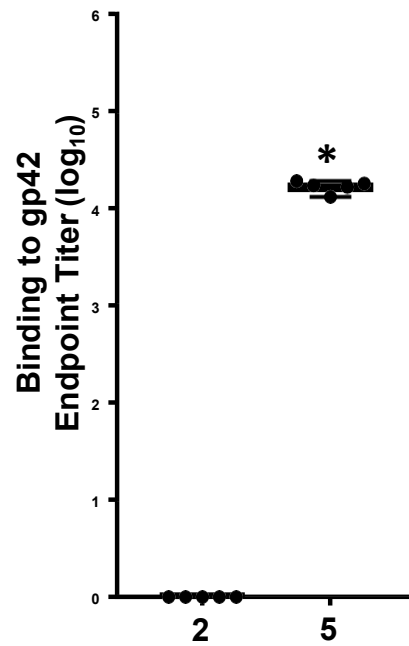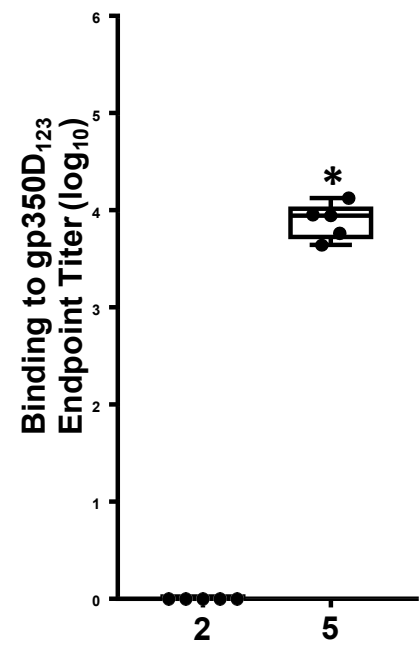

Immunogen: **gH/gL-NP + gp350D<sub>123</sub>-NP**

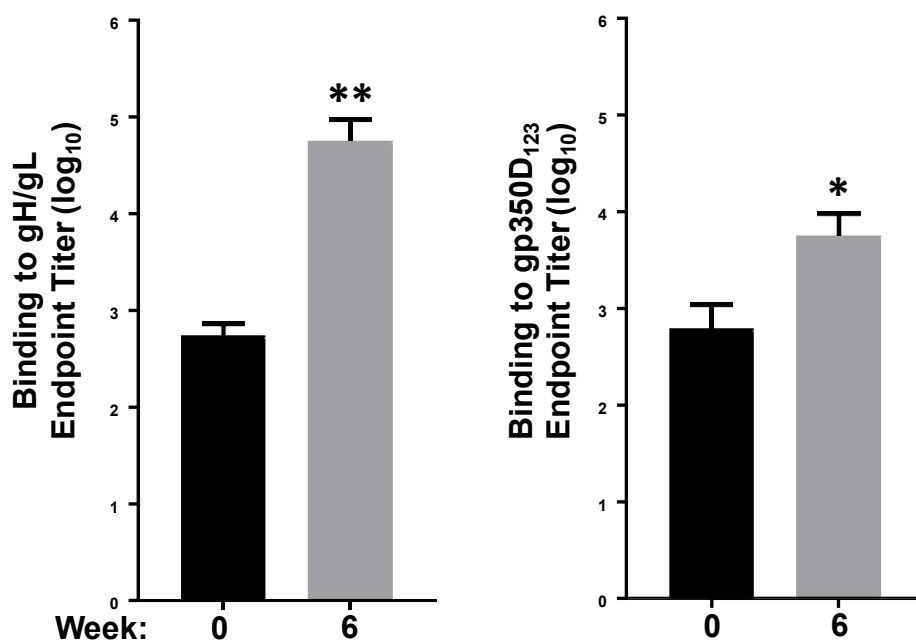

Immunogen: **gH/gL/gp42-NP + gp350D<sub>123</sub>-NP**

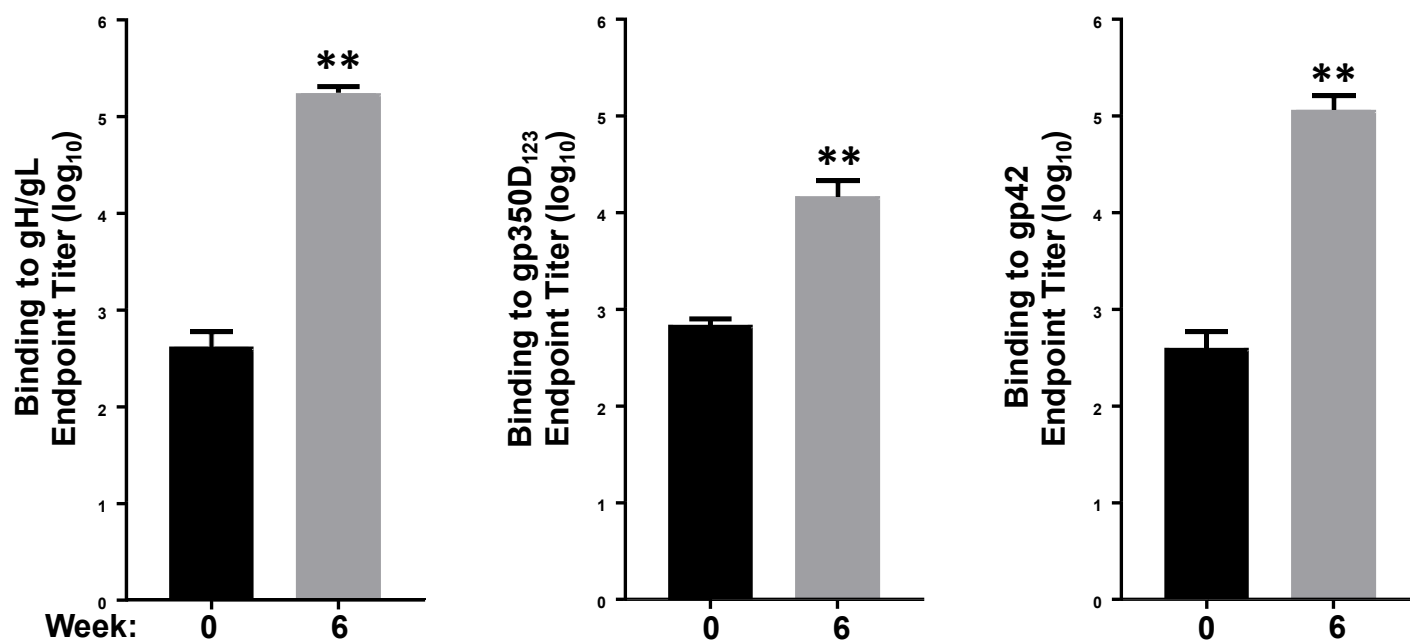

Immunogen: **gH/gL-NP + gp350D<sub>123</sub>-NP**

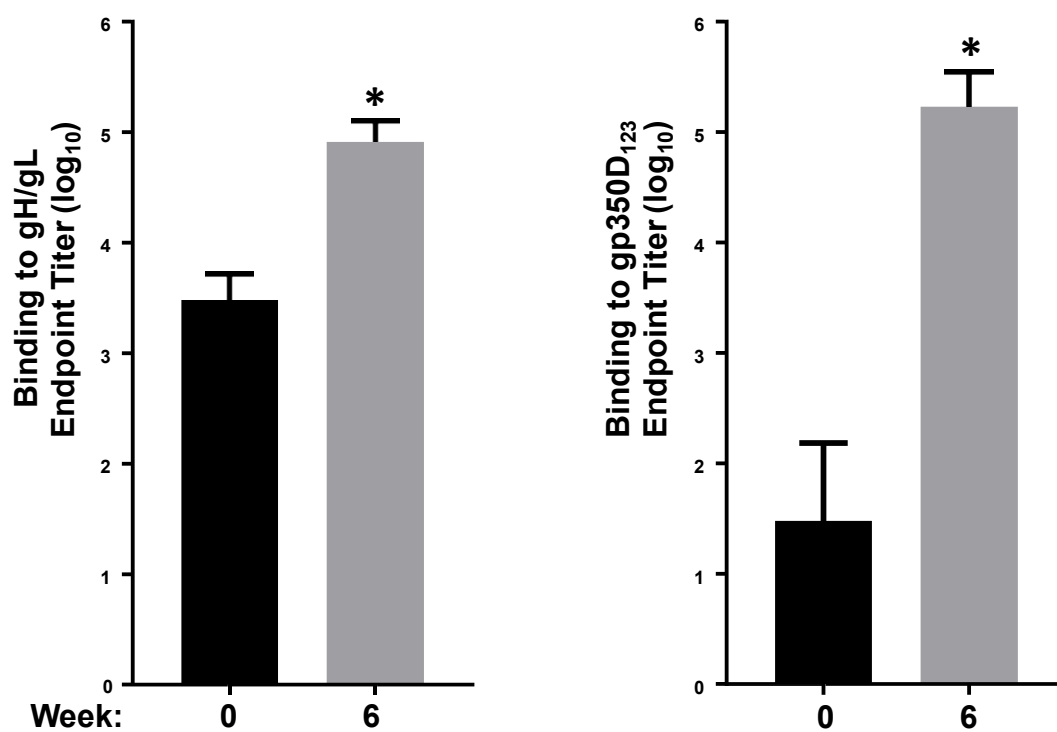

Immunogen: **gH/gL/gp42-NP + gp350D<sub>123</sub>-NP**

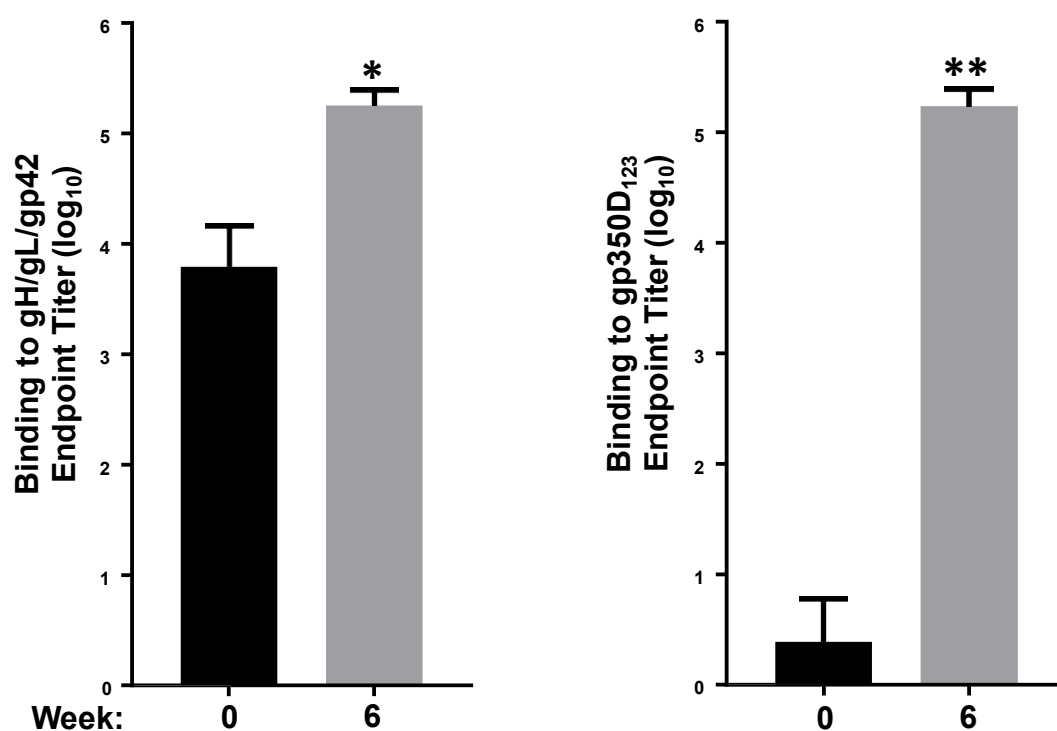

a

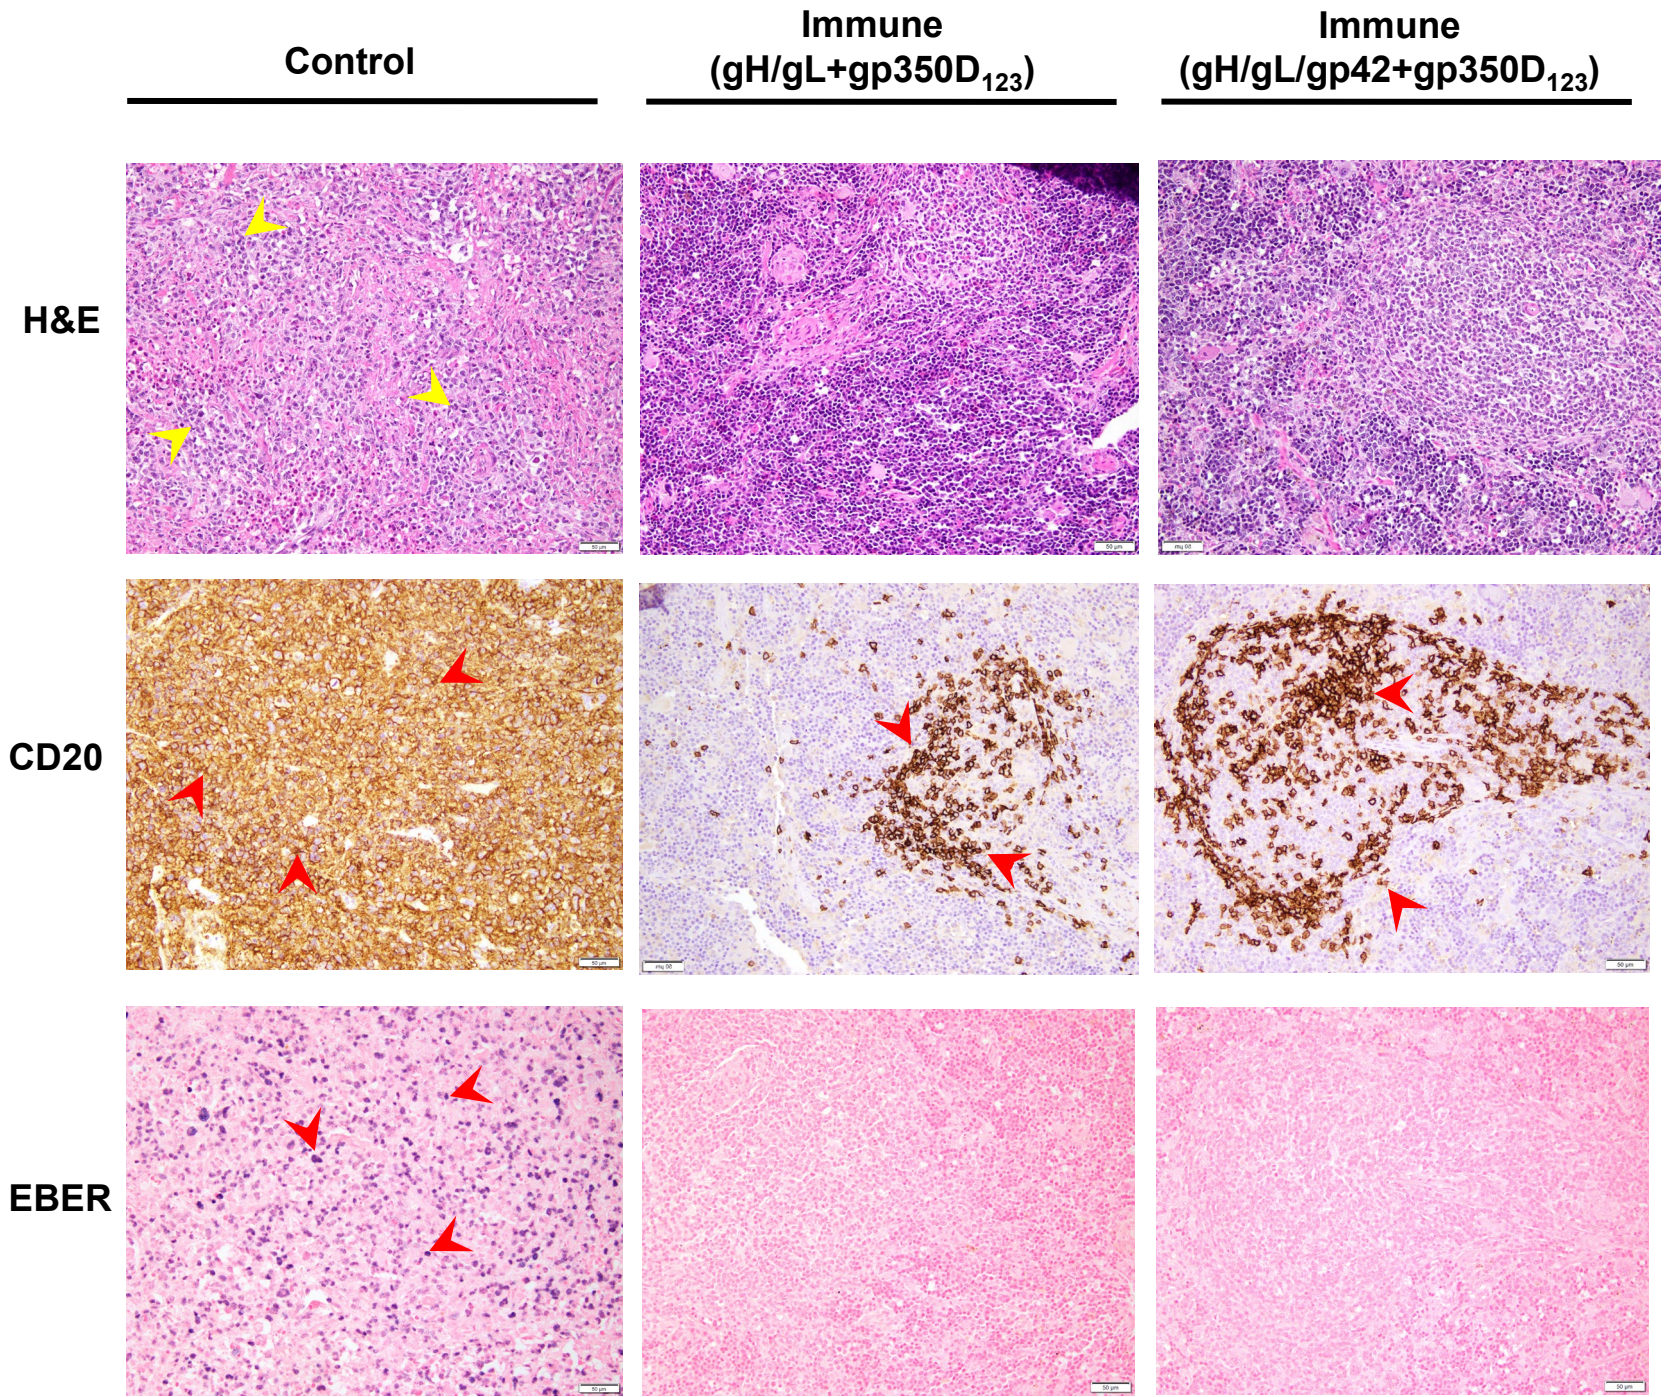

b

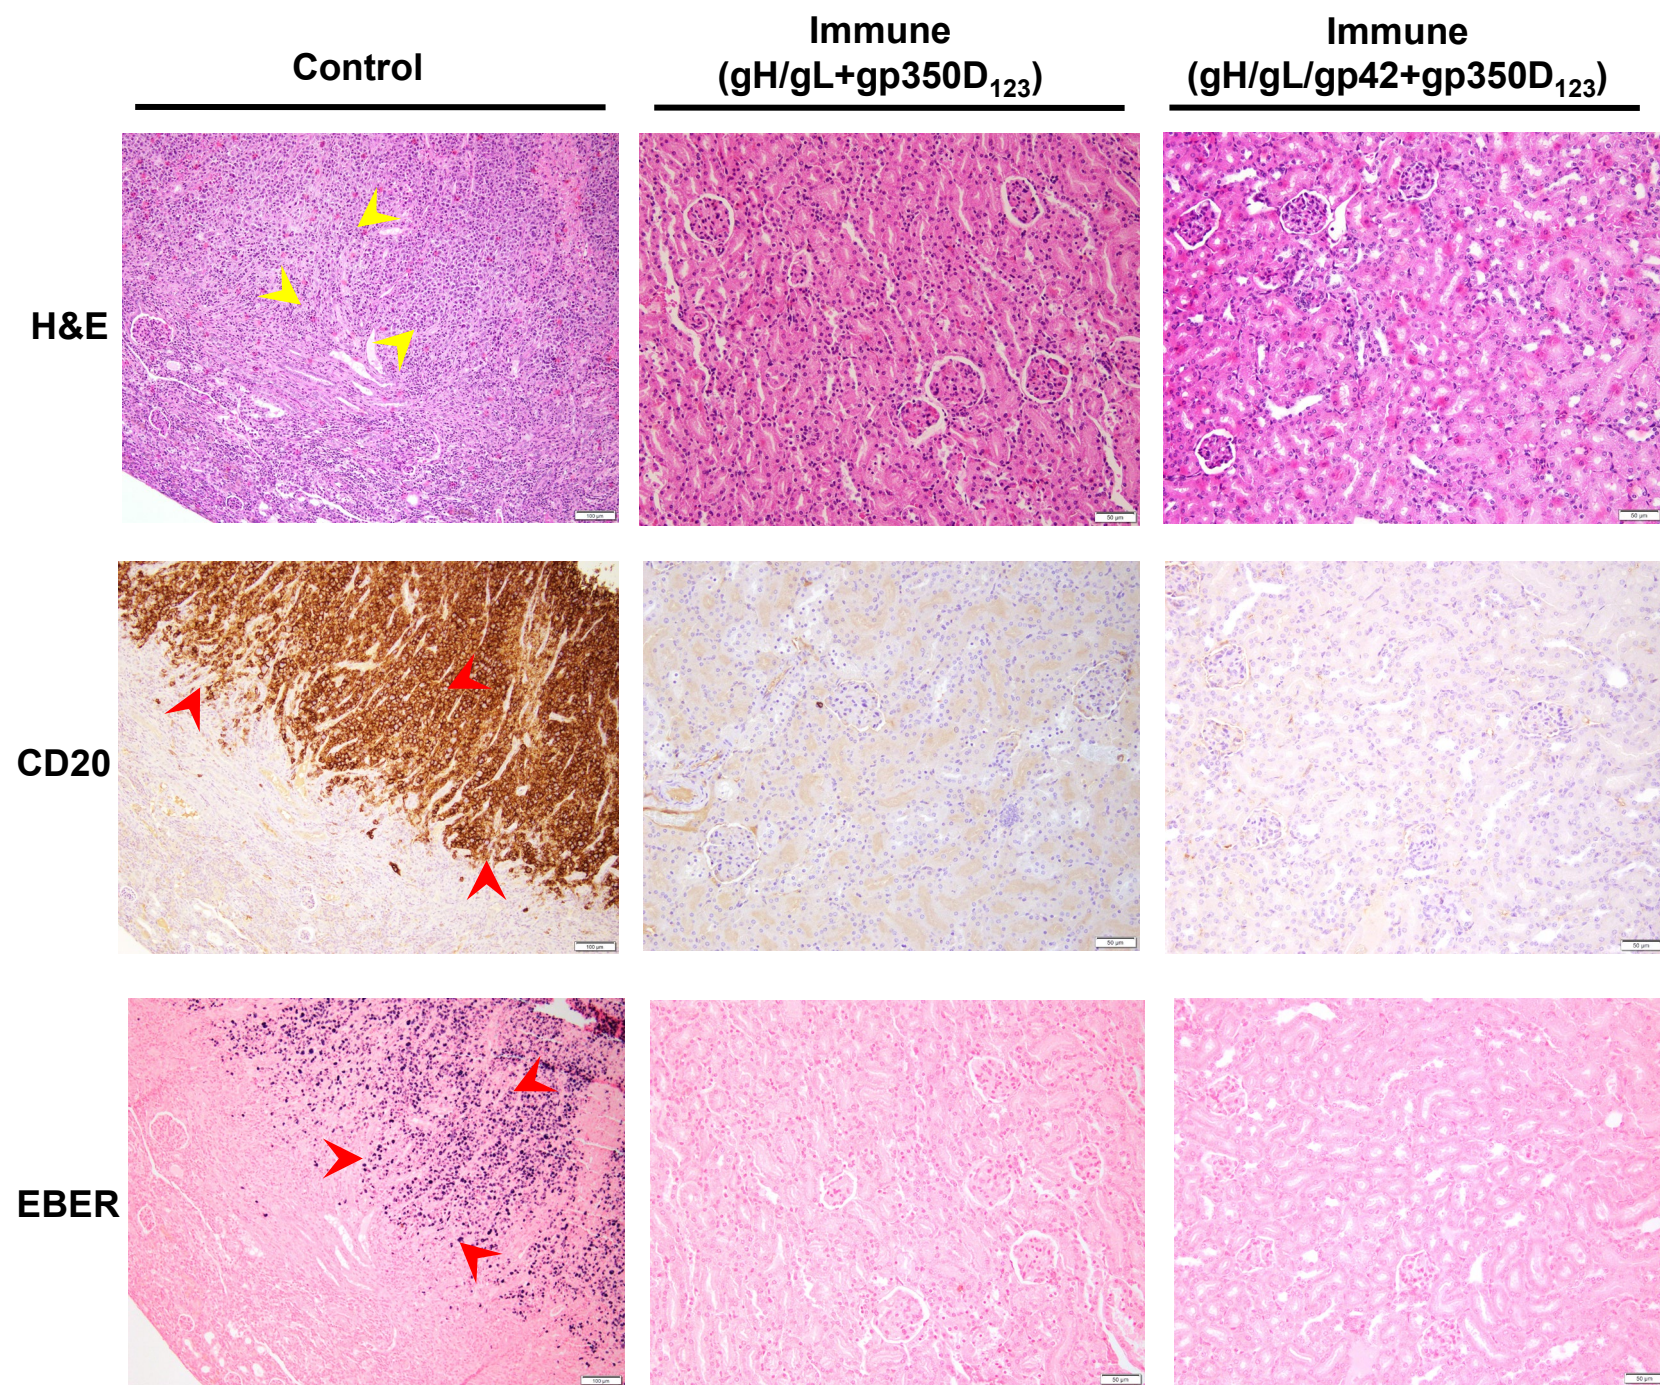

## Supplemental Fig. 8

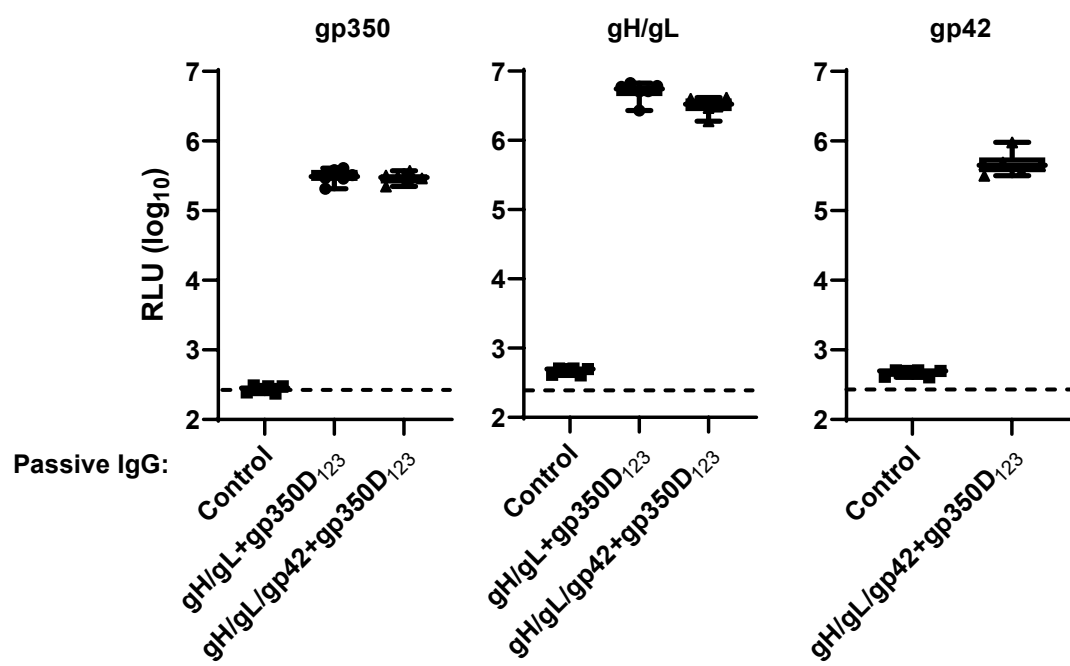

Source: http://biorxiv.org/content/10.1101/2022.01.18.476774v1.full.pdf
